# Supplementary material for: Experimental and computational studies on pseudotetrahedral nickel(ii)-(S or R)-dihalogen-salicylaldiminates with Δ- or Λ-chirality induction at-metal
Source: Royal Society of Chemistry journal article supplement (doi:10.1039/d2ce01311h), 2022-11-15
Supplement: d2ce01311h1.pdf [file d2ce01311h1.pdf]

## Electronic supplementary information (ESI)

### Experimental and computational studies on pseudotetrahedral nickel(II)-(R or S)-dihalogen-salicylaldiminates with $\Delta$ - or $\Lambda$ -chirality induction at-metal

Arezoo Saadati,<sup>a</sup> Hadi Amiri Rudbari,<sup>a,\*</sup> Mahnaz Aryaeifar,<sup>a</sup> Olivier Blacque,<sup>b</sup> Isabel Correia,<sup>c</sup> Mohammad Khairul Islam,<sup>d</sup> Dennis Woschko,<sup>e</sup> Takin Haj Hassani Sohi<sup>e</sup>, Christoph Janiak<sup>e</sup> and Mohammed Enamullah<sup>d,\*</sup>

<sup>a</sup> Department of Chemistry, University of Isfahan, Isfahan 81746-73441, Iran.

<sup>b</sup> Department of Chemistry, University of Zurich, Winterthurerstrasse 190, CH-8057, Zurich, Switzerland.

<sup>c</sup> Centro de Química Estrutural, Institute of Molecular Sciences, Departamento de Engenharia Química, Instituto Superior Técnico, Universidade de Lisboa, Av. Rovisco Pais 1, 1049-001 Lisboa, Portugal.

<sup>d</sup> Department of Chemistry, Jahangirnagar University, Dhaka 1342, Bangladesh.

<sup>e</sup> Institut für Anorganische Chemie und Strukturchemie, Universität Düsseldorf, Universitätsstr. 1, D-40225 Düsseldorf, Germany.

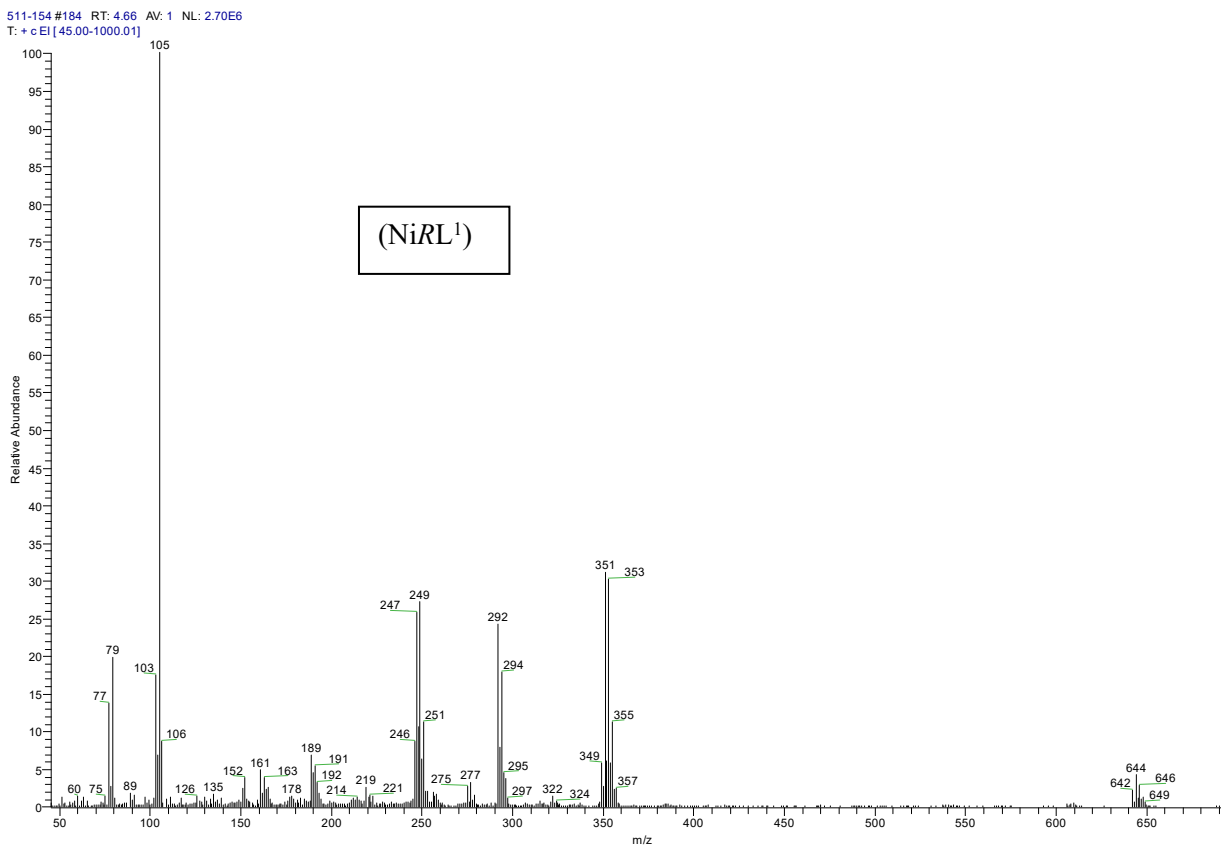

511-148 #126 RT: 3.23 AV: 1 NL: 5.01E6  
T: + c EI [45.00-900.03]

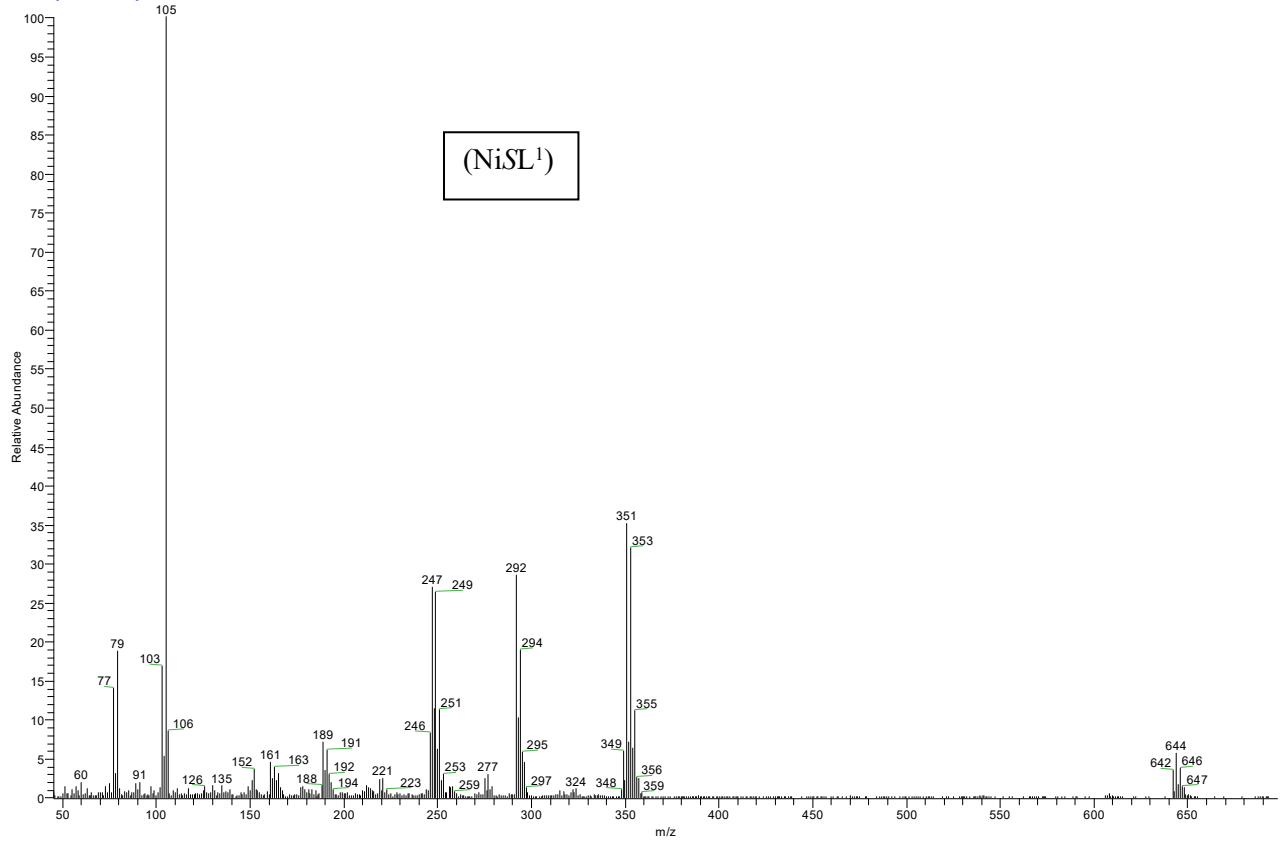

511-149 #175 RT: 4.47 AV: 1 NL: 1.37E6  
T: + c EI [45.00-900.03]

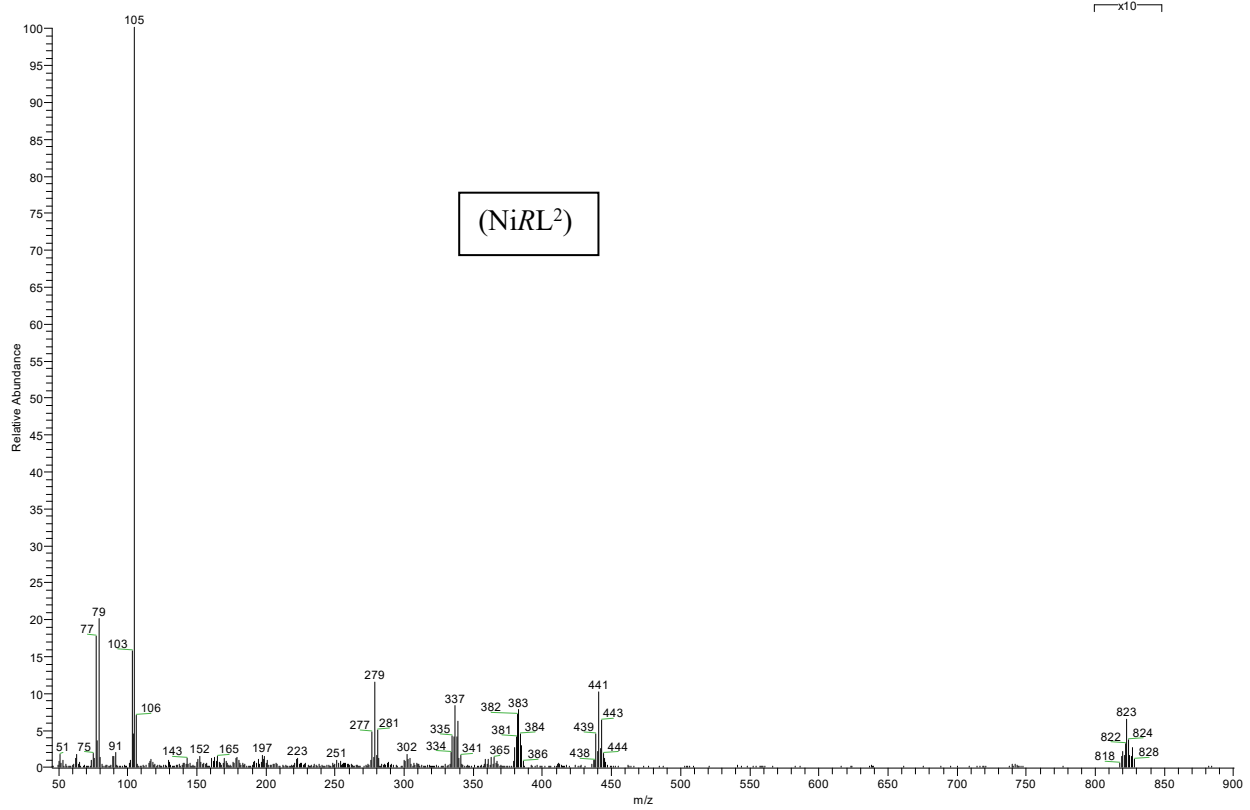

511-152 #214 RT: 5.42 AV: 1 NL: 2.31E6  
T: + c E1 [45.00-1000.01]

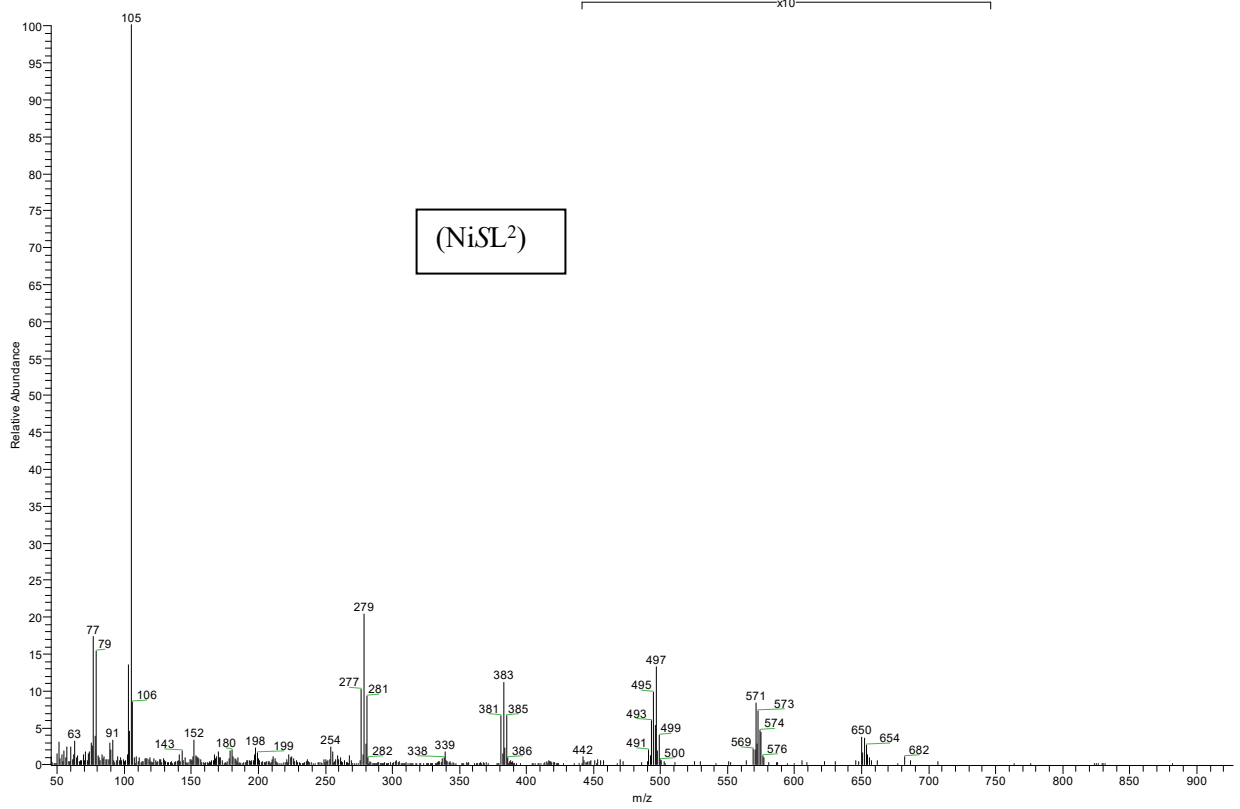

511-147 #105 RT: 2.70 AV: 1 NL: 2.61E6  
T: + c E1 [45.00-900.03]

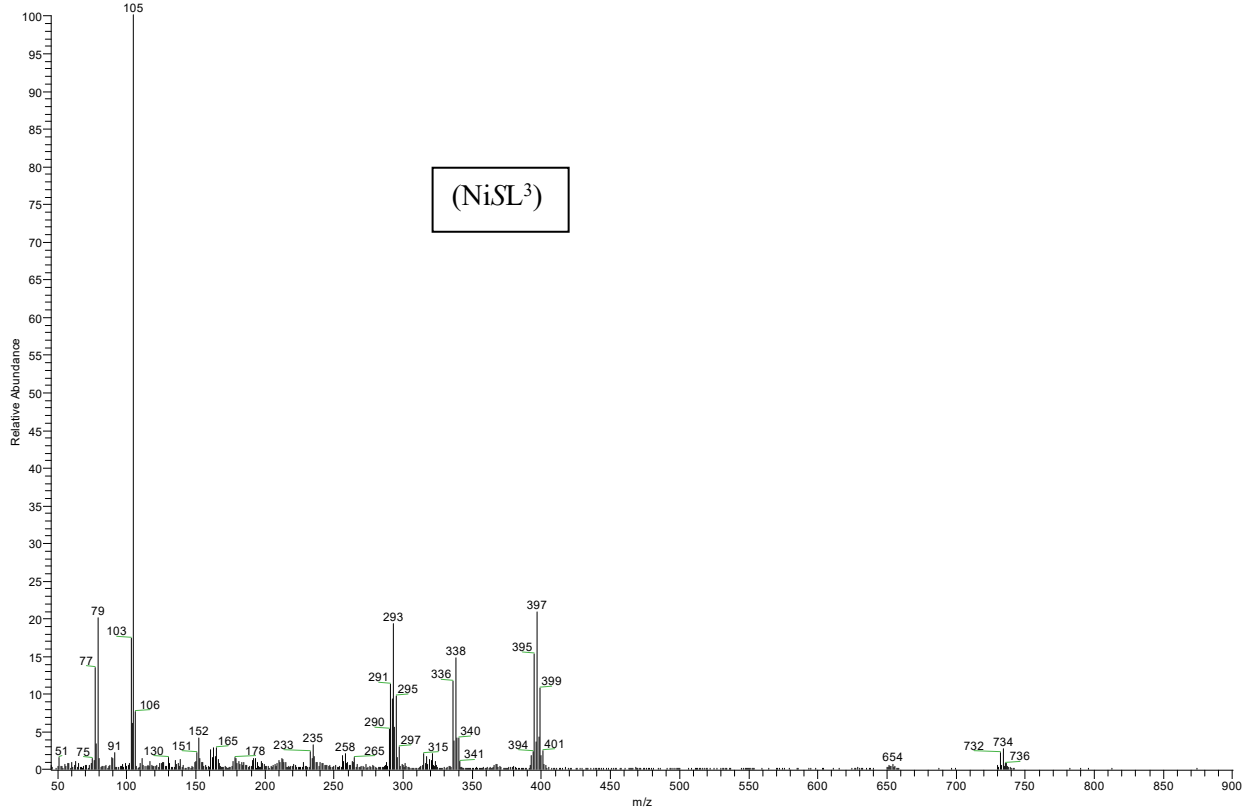

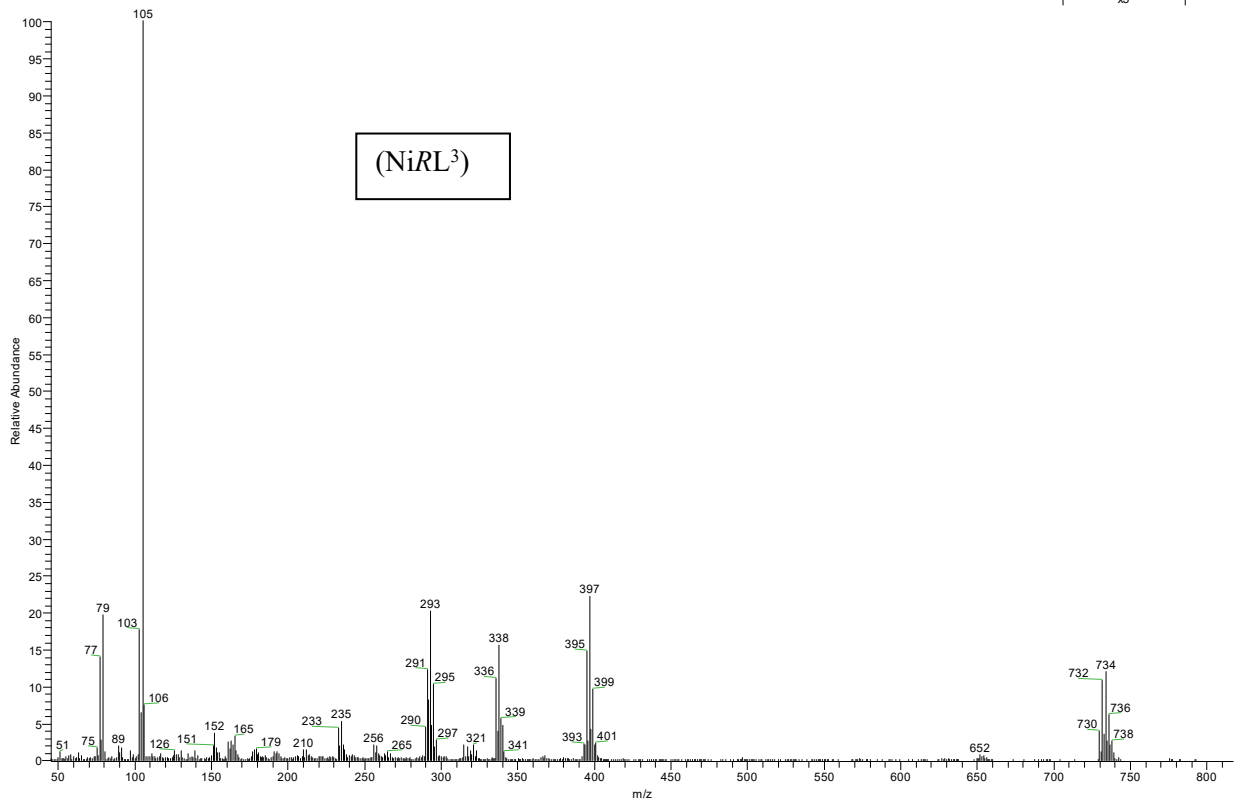

Fi

g. S1 EI-mass spectra for nickel(II)-Schiff bases complexes.

$\Delta$ -NiRL<sup>1</sup>

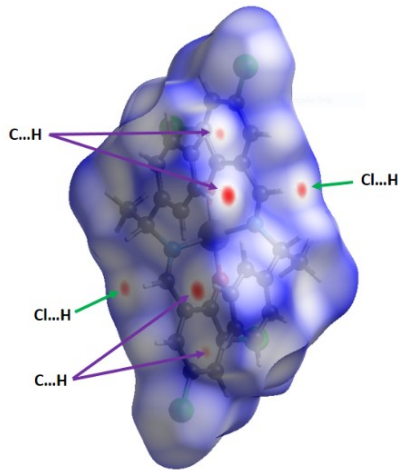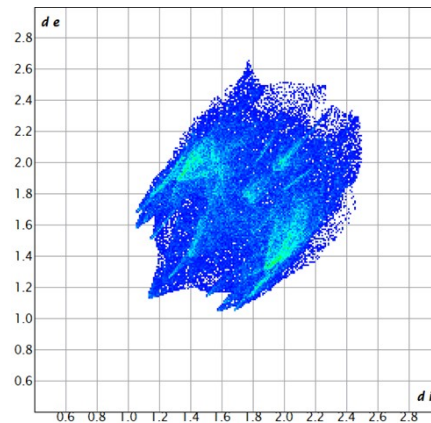

$\Delta$ -NiSL<sup>1</sup>

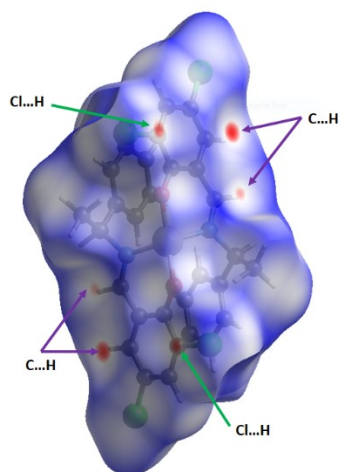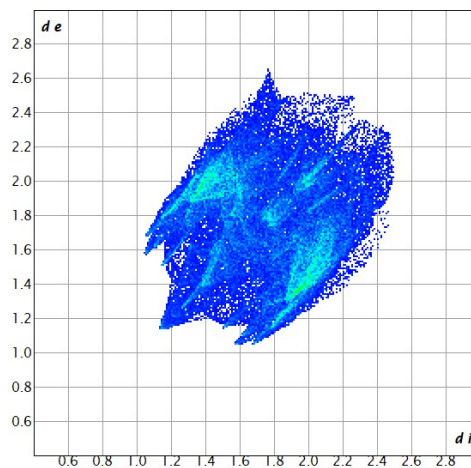

$\Delta$ -NiSL<sup>2</sup>

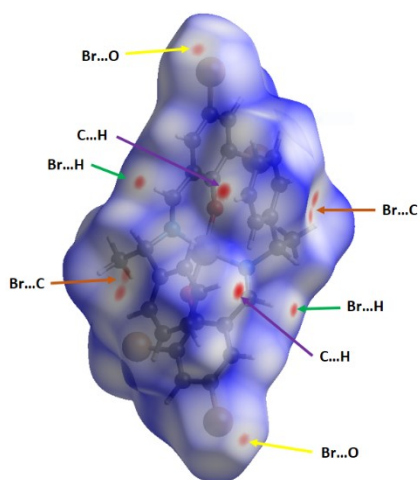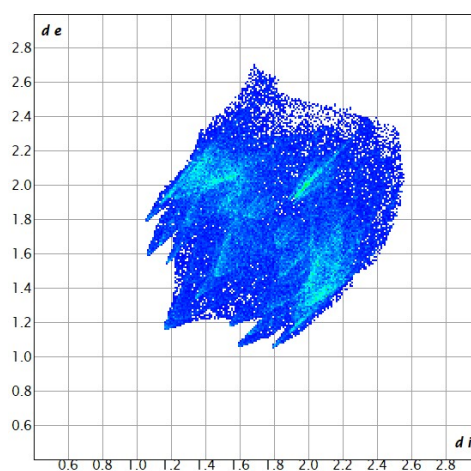

$\Delta$ -NiRL<sup>3</sup>

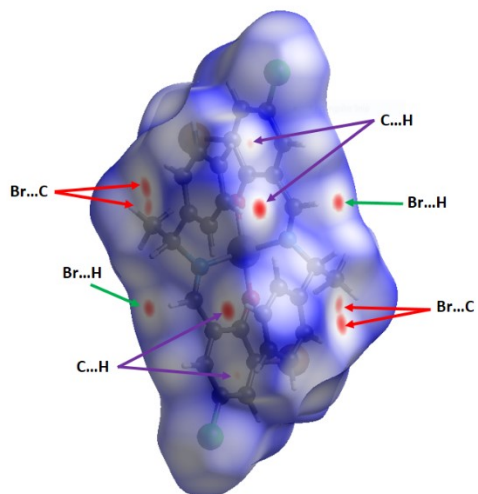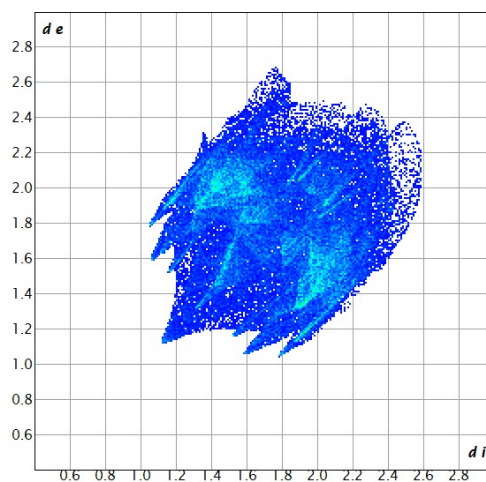

$\Delta$ -NiSL<sup>3</sup>

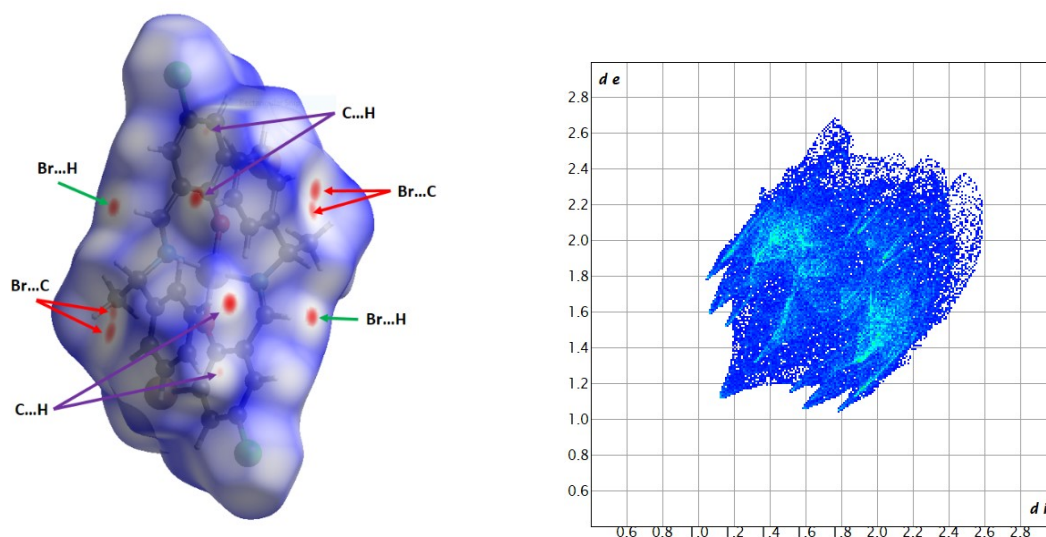

**Fig. S2** Hirshfeld surfaces mapped with  $d_{\text{norm}}$  properties and fingerprint plots for  $\Delta$ -NiRL<sup>1,3</sup> and  $\Delta$ -NiSL<sup>1-3</sup>. Red spots represent the closest contacts and blue the most distant contacts. ESP (Electrostatic potential) plotted on Hirshfeld surface mapped from  $-0.875$  au (red) to  $1.1415$  au (blue).

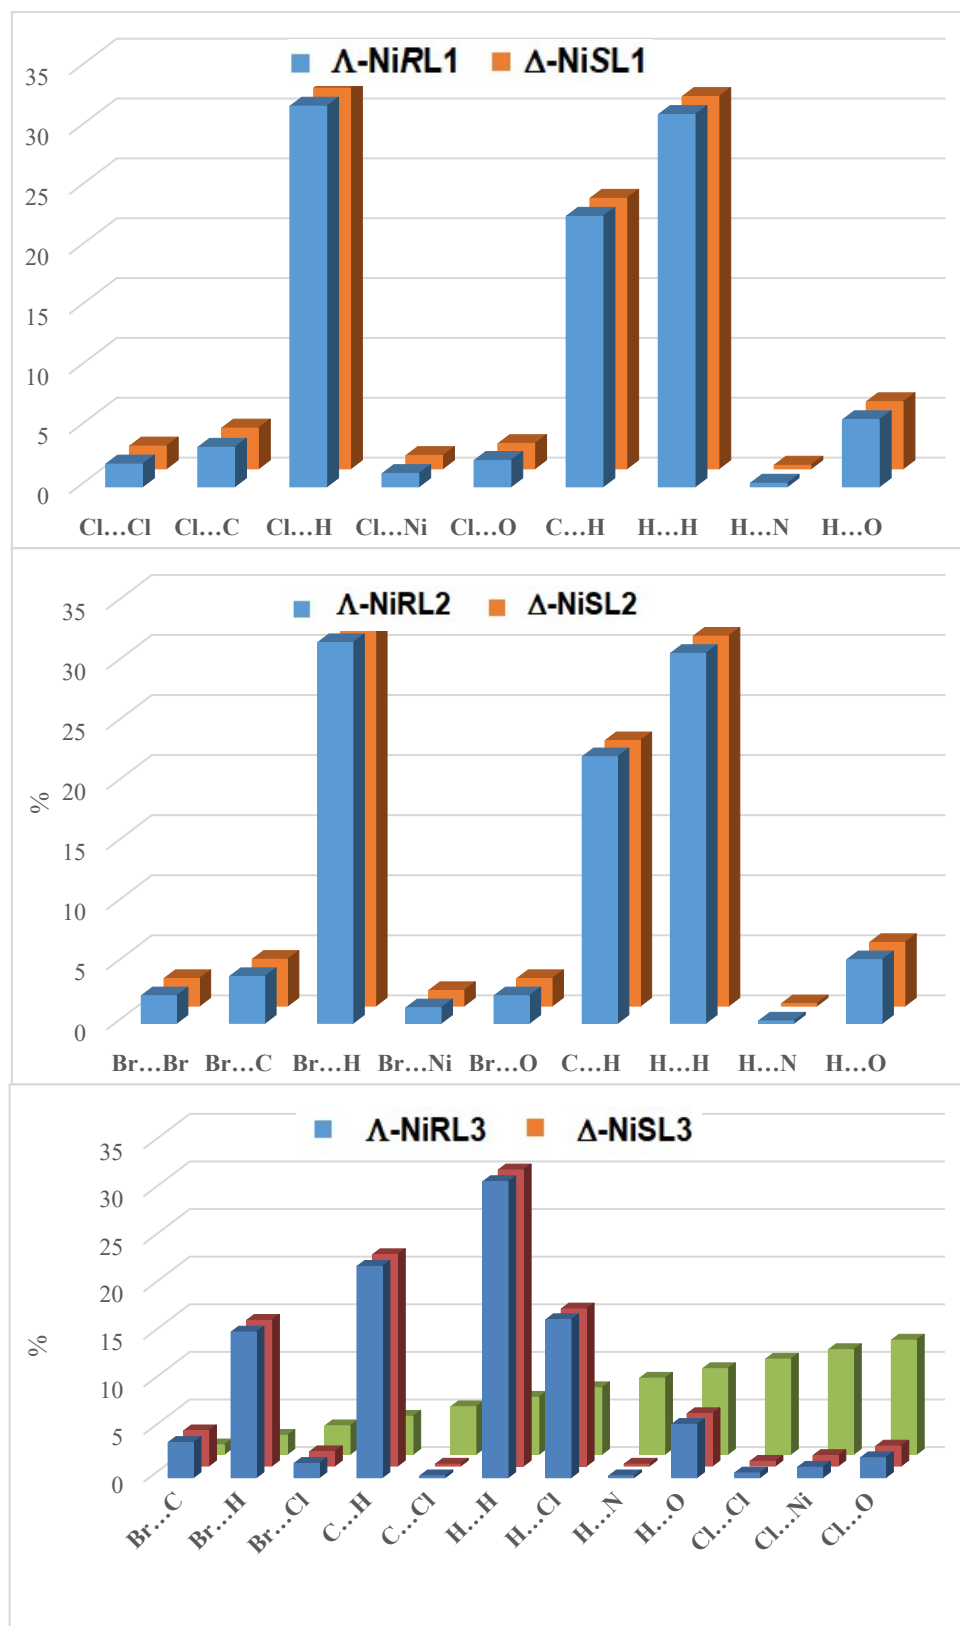

**Fig. S3** Relative contributions to the Hirshfeld surfaces area for different intermolecular contacts in nickel(II)-Schiff bases complexes.

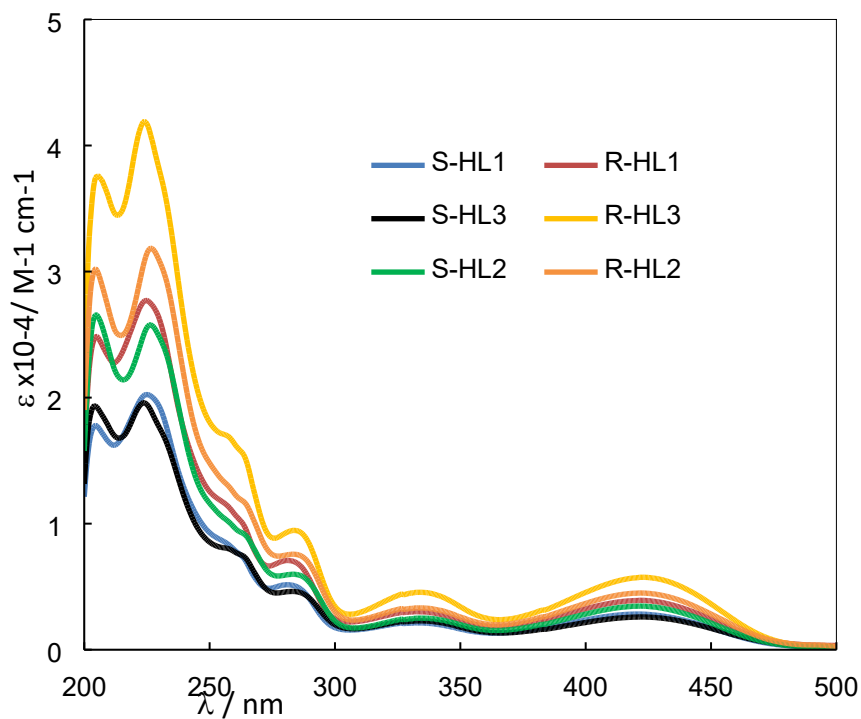

**Fig. S4** UV-Vis. spectra for Schiff bases  $R\text{-HL}^1/S\text{-HL}^1$  ( $3.24/3.22 \times 10^{-2}$  mM),  $R\text{-HL}^2/S\text{-HL}^2$  ( $2.45/3.09 \times 10^{-2}$  mM) and  $R\text{-HL}^3/S\text{-HL}^3$  ( $2.79/3.10 \times 10^{-2}$  mM) in methanol at 25 °C.

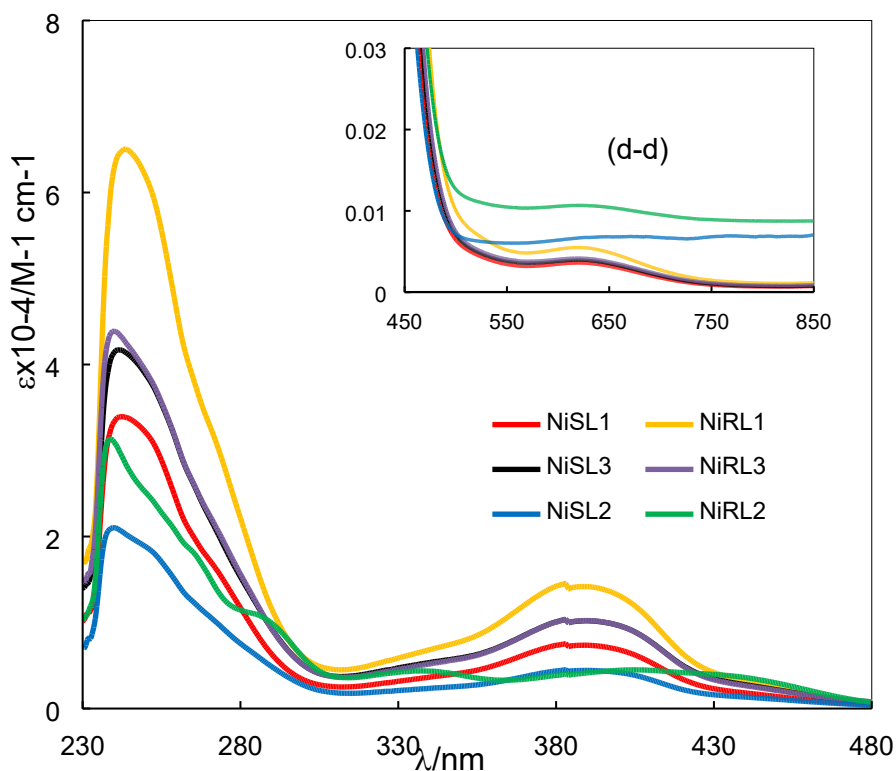

**Fig. S5** UV-Vis. spectra for  $\text{NiRL}^1/\text{NiSL}^1$  ( $2.00/2.84 \times 10^{-2}$  mM),  $\text{NiRL}^2/\text{NiSL}^2$  ( $1.76/2.29 \times 10^{-2}$  mM) and  $\text{NiRL}^3/\text{NiSL}^3$  ( $1.44/1.89 \times 10^{-2}$  mM) in methanol/chloroform (50%, v/v) at 25 °C.



| $\Lambda$ -diastereomer                                                                                                                                                                                  | $\Delta$ -diastereomer                                                                                                                                                                                         |
|----------------------------------------------------------------------------------------------------------------------------------------------------------------------------------------------------------|----------------------------------------------------------------------------------------------------------------------------------------------------------------------------------------------------------------|
| 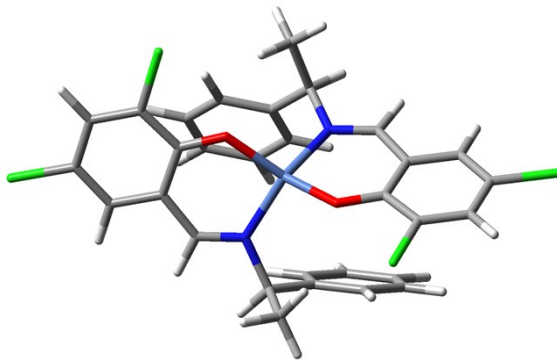 <p data-bbox="183 604 726 705"><math>\Lambda</math>-ZnRL<sup>1</sup>, -4766.249579 a.u. (stable by 1.69 kcal/mol).</p> |  <p data-bbox="885 616 1236 660"><math>\Delta</math>-NiRL<sup>1</sup>, -4766.246884 a.u.</p>                                 |
|  <p data-bbox="279 1131 630 1176"><math>\Lambda</math>-NiSL<sup>1</sup>, -4766.249428 a.u.</p>                         |  <p data-bbox="798 1108 1332 1198"><math>\Delta</math>-NiSL<sup>1</sup>, -4766.249580 a.u. (stable by 0.10 kcal/mol).</p>   |
|  <p data-bbox="271 1612 630 1657"><math>\Lambda</math>-NiSL<sup>2</sup>, -13212.295473 a.u.</p>                       |  <p data-bbox="798 1601 1332 1691"><math>\Delta</math>-NiSL<sup>2</sup>, -13212.295757 a.u. (stable by 0.18 kcal/mol).</p> |

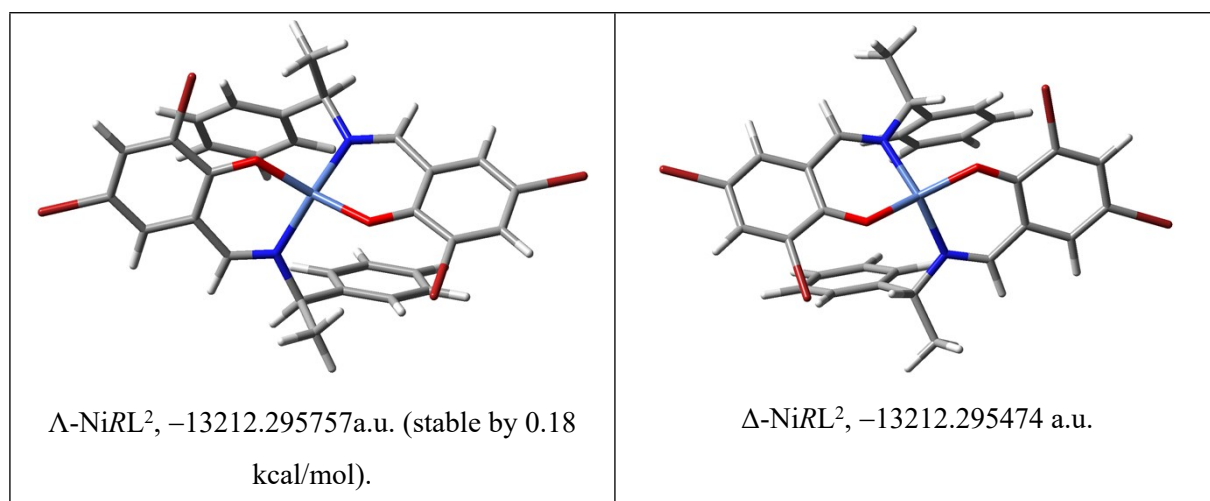

**Fig. S6** DFT optimized structures for the diastereomeric pairs of  $\Lambda$ -NiRL<sup>1-2</sup>/ $\Delta$ -NiRL<sup>1-2</sup> and  $\Delta$ -NiSL<sup>1-2</sup>/ $\Lambda$ -NiSL<sup>1-2</sup> at b3lyp/6-31G(d), respectively.

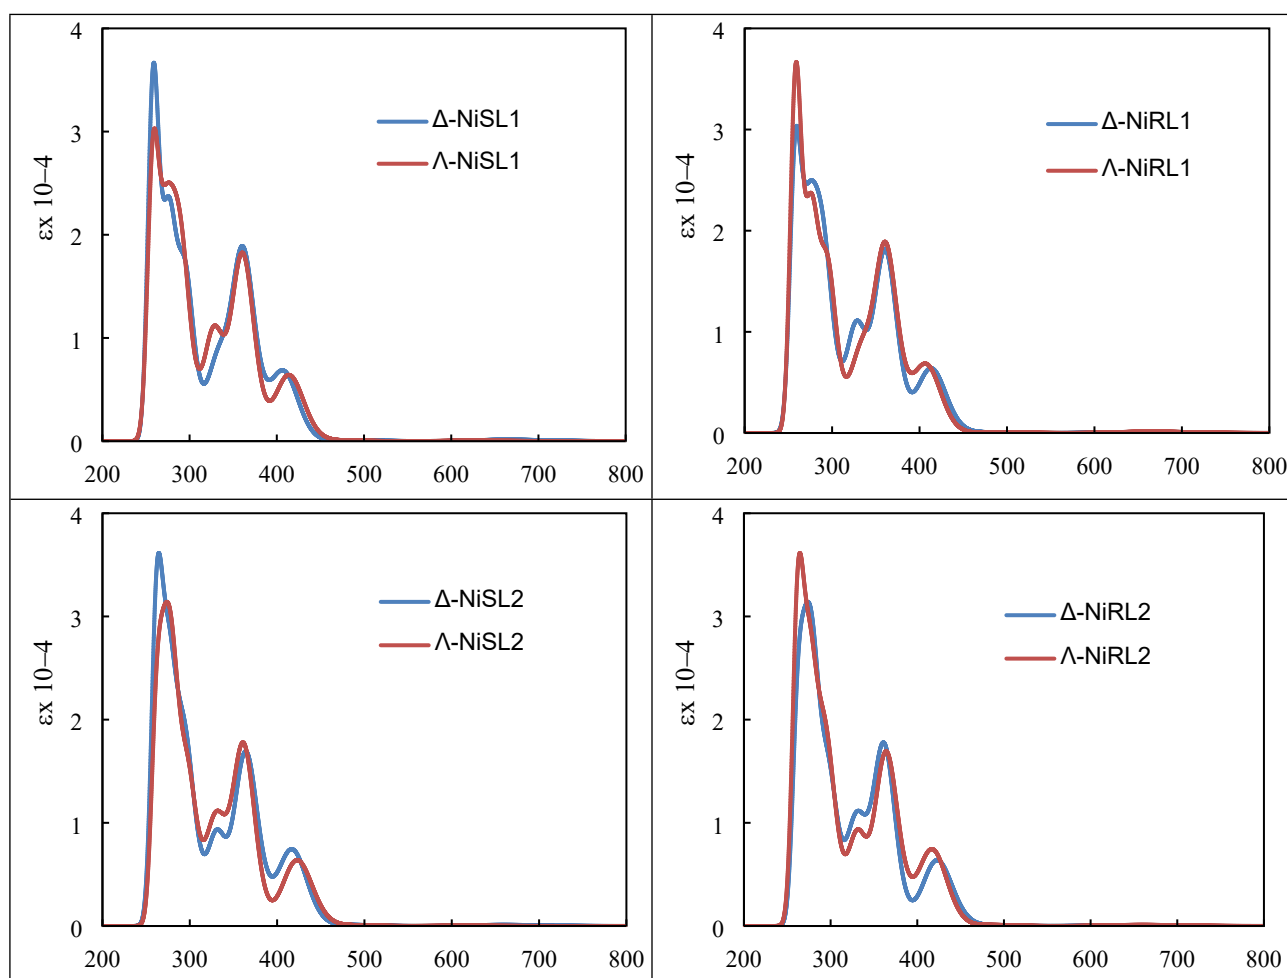

**Fig. S7** Simulated UV-Vis. spectra for diastereomeric pairs of  $\Lambda$ -NiSL<sup>1-2</sup>/ $\Delta$ -NiSL<sup>1-2</sup> and  $\Lambda$ -NiRL<sup>1-2</sup>/ $\Delta$ -NiRL<sup>1-2</sup> at b3lyp/6-31G(d) with PCM in chloroform. Gaussian band shape with exponential half-width  $\sigma = 0.16$  eV.

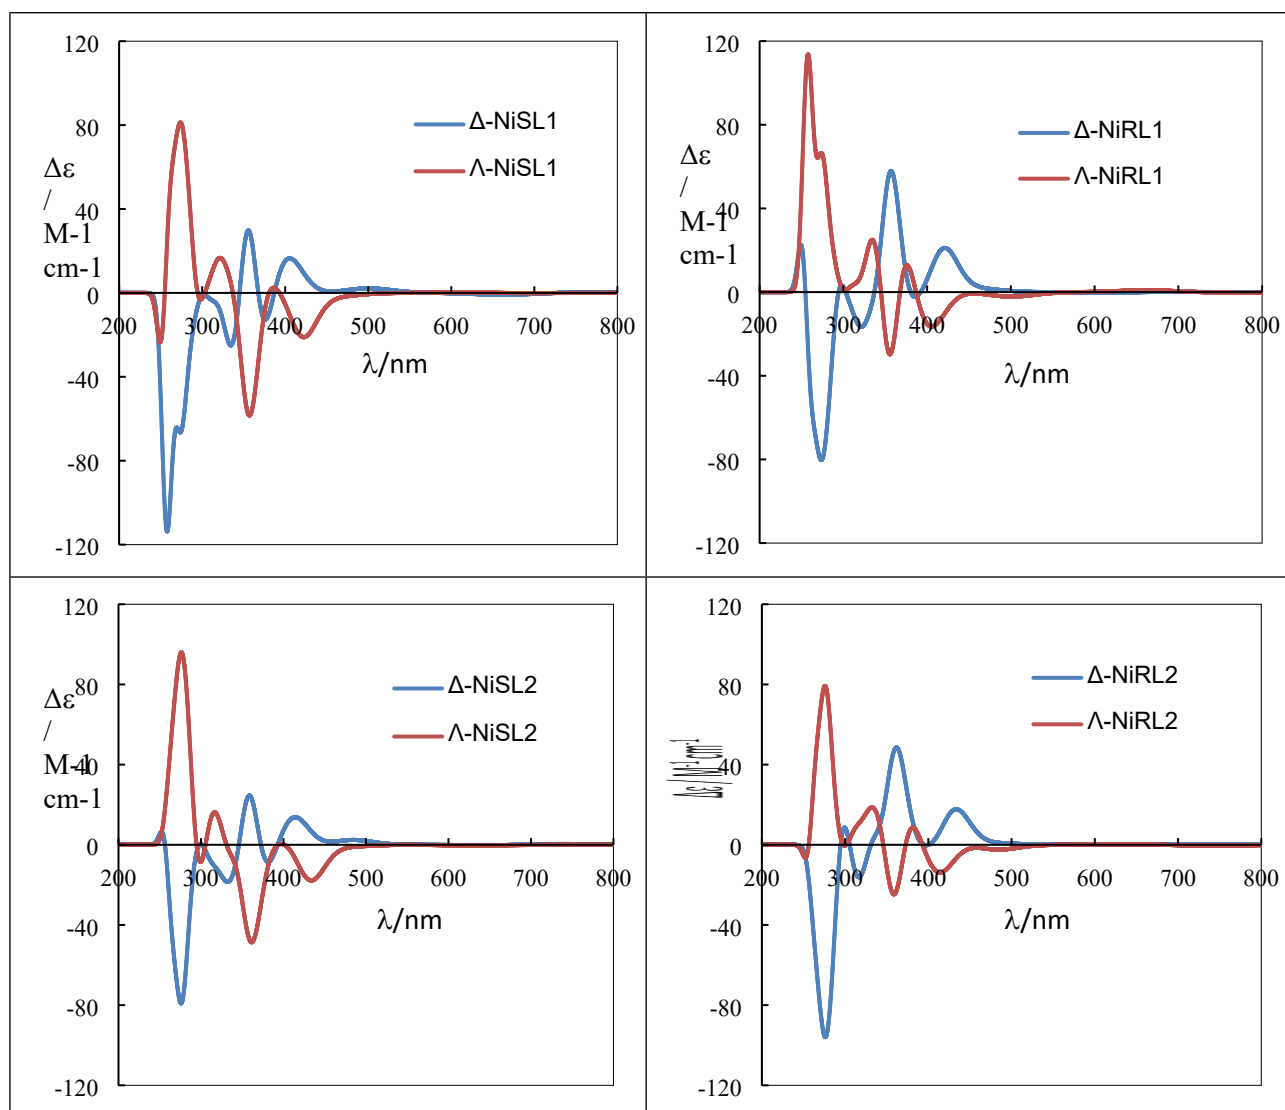

**Fig. S8** Simulated ECD spectra for diastereomeric pairs  $\Lambda$ -NiSL<sup>1-2</sup>/ $\Delta$ -NiSL<sup>1-2</sup> and  $\Lambda$ -NiRL<sup>1-2</sup>/ $\Delta$ -NiRL<sup>1-2</sup> at b3lyp/6-31G(d) with PCM in chloroform. Gaussian band shape with exponential half-width  $\sigma = 0.16$  eV.

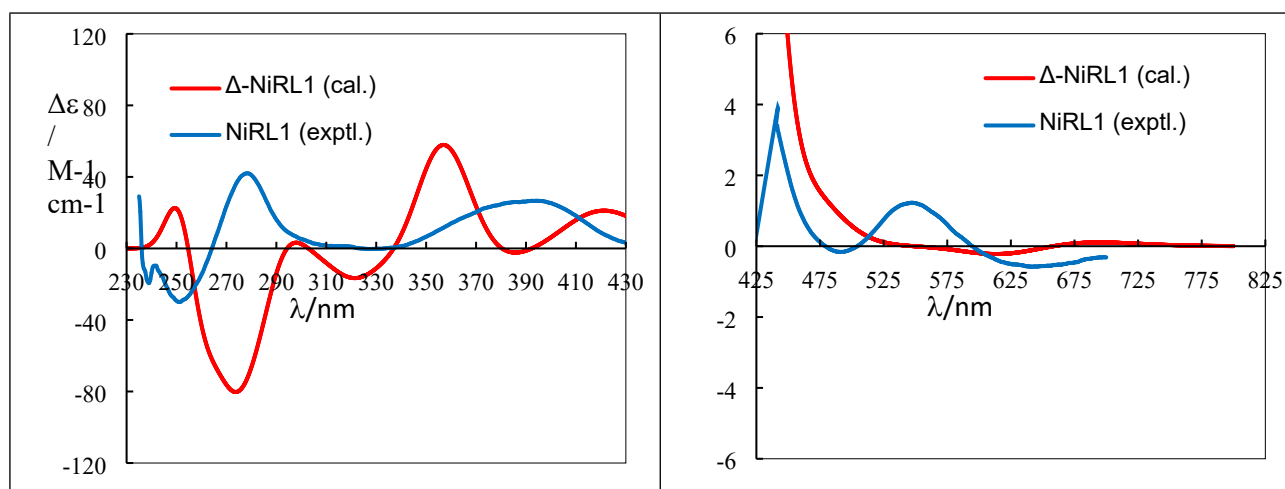

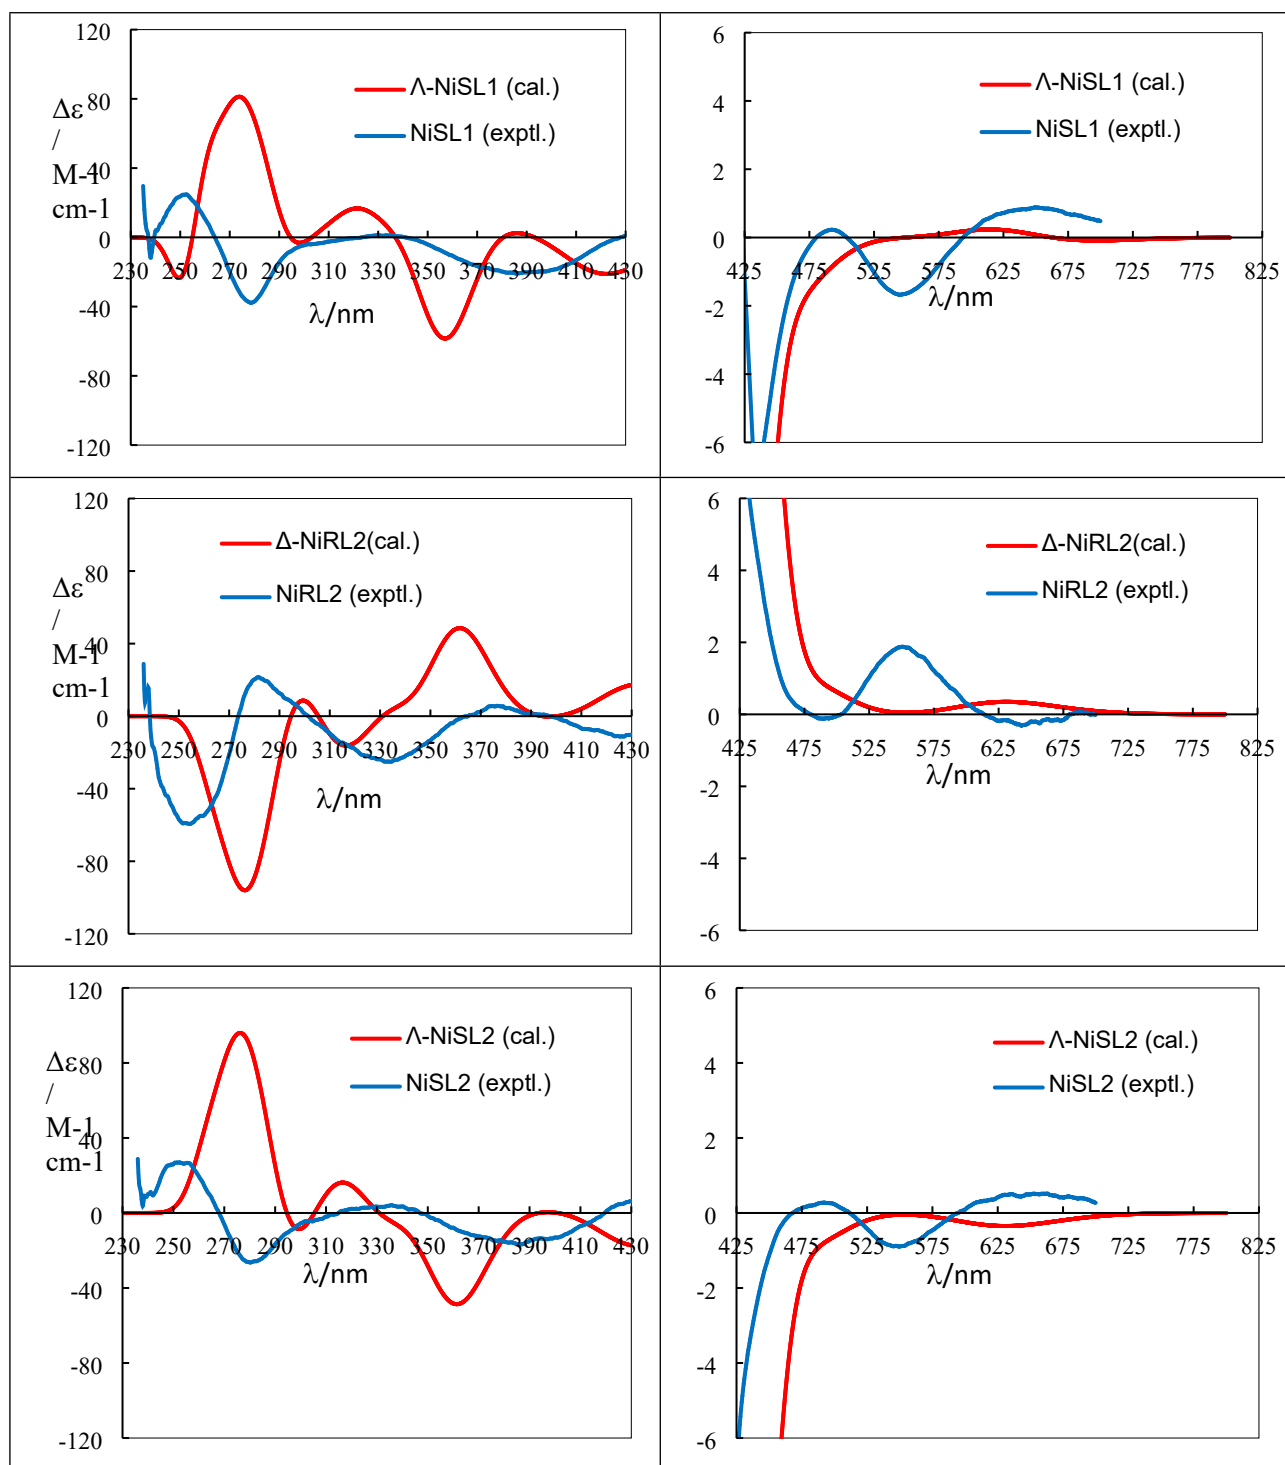

**Fig. S9** Opposite matching of experimental and simulated ECD spectra: (a) experimental spectra (*ca.*  $2.0 \times 10^{-2}$  mM at 500-235 nm and *ca.* 1.0 mM at 700-425 nm) in methanol:chloroform (50%, v/v) at 20 °C ( $\Delta\epsilon_{\text{exptl.}}$  values are multiplied by 5); (b) simulated spectra calculated at b3lyp/6-31G(d) with PCM in chloroform. Gaussian band shape with exponential half-width  $\sigma = 0.16$  eV.

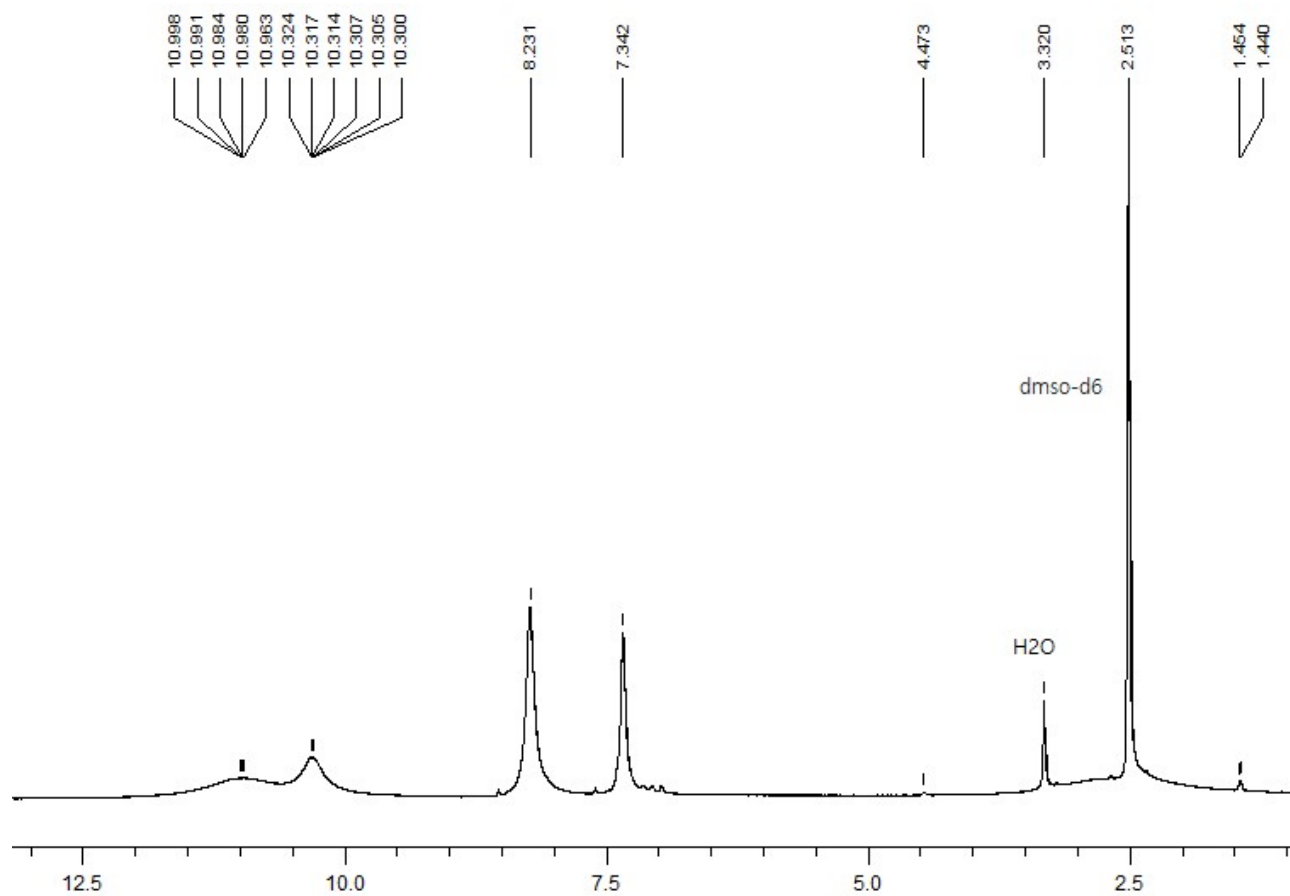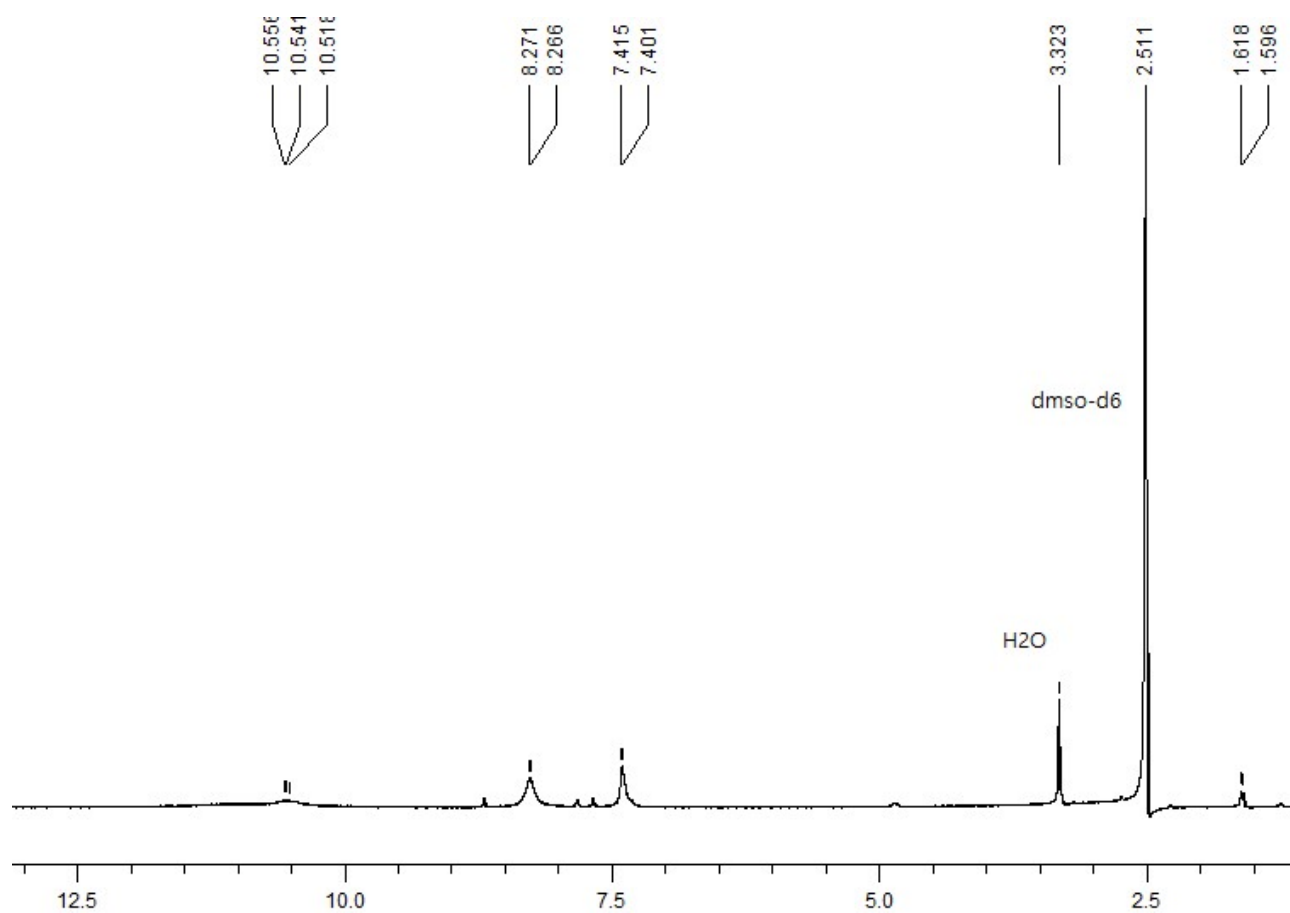

**Fig. S10**  $^1\text{H}$  NMR spectrum for NiRL<sup>1</sup> (top) and NiRL<sup>2</sup> (bottom) in dms<sub>o</sub>-d<sub>6</sub> at 20 °C.

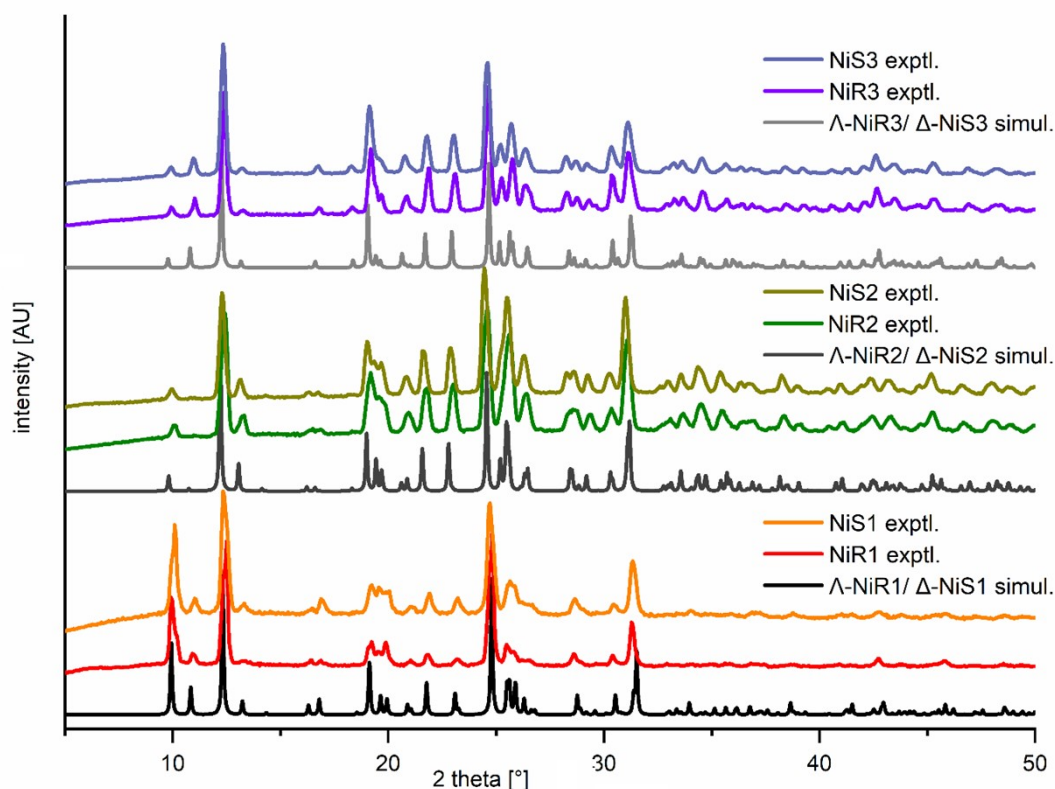

**Fig. S11.** Experimental and simulated PXRD patterns (from single crystal X-ray structure) for NiRL<sup>1-3</sup> and NiSL<sup>1-3</sup> at ambient temperature.

**Table S1** Crystal data and structure refinement data for Ni(II)-Schiff bases complexes.

|                                                 | $\Lambda$ -NiRL <sup>1</sup>                                                    | $\Lambda$ -NiRL <sup>2</sup>                                                    | $\Lambda$ -NiRL <sup>3</sup>                                                                    | $\Delta$ -NiSL <sup>1</sup>                                                     | $\Delta$ -NiSL <sup>2</sup>                                                     | $\Delta$ -NiSL <sup>3</sup>                                                     |
|-------------------------------------------------|---------------------------------------------------------------------------------|---------------------------------------------------------------------------------|-------------------------------------------------------------------------------------------------|---------------------------------------------------------------------------------|---------------------------------------------------------------------------------|---------------------------------------------------------------------------------|
| Empirical formula                               | C <sub>30</sub> H <sub>24</sub> Cl <sub>4</sub> NiN <sub>2</sub> O <sub>2</sub> | C <sub>30</sub> H <sub>24</sub> Br <sub>4</sub> NiN <sub>2</sub> O <sub>2</sub> | C <sub>30</sub> H <sub>24</sub> Br <sub>2</sub> Cl <sub>2</sub> NiN <sub>2</sub> O <sub>2</sub> | C <sub>30</sub> H <sub>24</sub> Cl <sub>4</sub> NiN <sub>2</sub> O <sub>2</sub> | C <sub>30</sub> H <sub>24</sub> Br <sub>4</sub> NiN <sub>2</sub> O <sub>2</sub> | C <sub>30</sub> H <sub>24</sub> Br <sub>4</sub> NiN <sub>2</sub> O <sub>2</sub> |
| <i>M</i> (g mol <sup>-1</sup> )                 | 645.02                                                                          | 822.86                                                                          | 733.94                                                                                          | 645.02                                                                          | 822.86                                                                          | 733.94                                                                          |
| Temperature (K)                                 | 160(1)                                                                          | 160(1)                                                                          | 160(1)                                                                                          | 160(1)                                                                          | 160(1)                                                                          | 160(1)                                                                          |
| Wavelength (Å)                                  | 1.54184                                                                         | 0.71073                                                                         | 0.71073                                                                                         | 0.71073                                                                         | 1.54184                                                                         | 0.71073                                                                         |
| Crystal system                                  | Monoclinic                                                                      | Monoclinic                                                                      | Monoclinic                                                                                      | Monoclinic                                                                      | Monoclinic                                                                      | Monoclinic                                                                      |
| Space group                                     | I2                                                                              | I2                                                                              | I2                                                                                              | I2                                                                              | I2                                                                              | I2                                                                              |
| <i>a</i> (Å)                                    | 9.98147(15)                                                                     | 10.1024(2)                                                                      | 10.1101(2)                                                                                      | 9.9679(2)                                                                       | 10.10590(10)                                                                    | 10.09670(10)                                                                    |
| <i>b</i> (Å)                                    | 10.86524(17)                                                                    | 10.91929(18)                                                                    | 10.85749(19)                                                                                    | 10.8655(2)                                                                      | 10.93120(10)                                                                    | 10.85000(10)                                                                    |
| <i>c</i> (Å)                                    | 12.8851(2)                                                                      | 13.0659(3)                                                                      | 13.0218(3)                                                                                      | 12.8831(4)                                                                      | 13.06820(10)                                                                    | 13.0172(2)                                                                      |
| $\beta$ (°)                                     | 106.6972(17)                                                                    | 106.645(2)                                                                      | 107.285(2)                                                                                      | 106.713(3)                                                                      | 106.6210(10)                                                                    | 107.3140(10)                                                                    |
| <i>V</i> (Å <sup>3</sup> )                      | 1338.49(4)                                                                      | 1380.91(5)                                                                      | 1364.86(5)                                                                                      | 1336.37(6)                                                                      | 1383.32(2)                                                                      | 1361.41(3)                                                                      |
| <i>Z</i>                                        | 2                                                                               | 2                                                                               | 2                                                                                               | 2                                                                               | 2                                                                               | 2                                                                               |
| <i>D</i> <sub>calc.</sub> (g cm <sup>-3</sup> ) | 1.600                                                                           | 1.979                                                                           | 1.786                                                                                           | 1.603                                                                           | 1.976                                                                           | 1.790                                                                           |
| $\mu$ (mm <sup>-1</sup> )                       | 4.989                                                                           | 6.522                                                                           | 3.867                                                                                           | 1.159                                                                           | 8.042                                                                           | 3.877                                                                           |
| F(000)                                          | 660.0                                                                           | 804.0                                                                           | 732.0                                                                                           | 660.0                                                                           | 804.0                                                                           | 732.0                                                                           |
| $\theta$ range (°)                              | 9.942 to 148.978                                                                | 5.624 to 52.74                                                                  | 4.98 to 52.734                                                                                  | 4.996 to 52.738                                                                 | 9.818 to 148.848                                                                | 4.512 to 52.738                                                                 |

|                                                           |                  |               |               |               |               |               |
|-----------------------------------------------------------|------------------|---------------|---------------|---------------|---------------|---------------|
| <i>h; k; l</i> ranges                                     | -9,+12; ±13; ±16 | ±12; ±13; ±16 | ±12; ±13; ±16 | ±12; ±13; ±16 | ±12; ±13; ±16 | ±12; ±13; ±16 |
| Reflections collected                                     | 13792            | 13776         | 14452         | 13534         | 14700         | 17509         |
| Independent reflect. ( $R_{int}$ )                        | 2723 (0.0243)    | 2849 (0.0484) | 2797 (0.0226) | 2722 (0.0288) | 2850 (0.0242) | 2792 (0.0272) |
| Data/restraints/parameters                                | 2723/1/178       | 2849/1/178    | 2797/1/178    | 2722/1/178    | 2850/1/178    | 2792/1/178    |
| Goodness-of-fit on $F^2$ <sup>a</sup>                     | 1.058            | 1.028         | 1.045         | 1.054         | 1.073         | 1.064         |
| $R_1/wR_2$ [ $I > 2\sigma(I)$ ] <sup>b</sup>              | 0.0219/0.0571    | 0.0335/0.0841 | 0.0131/0.0334 | 0.0256/0.0647 | 0.0174/0.0461 | 0.0136/0.0325 |
| $R_1/wR_2$ (all data) <sup>b</sup>                        | 0.0225/0.0573    | 0.0352/0.0856 | 0.0134/0.0335 | 0.0272/0.0659 | 0.0174/0.0461 | 0.0141/0.0327 |
| Max./min. $\Delta\rho$ (e. Å <sup>-3</sup> ) <sup>c</sup> | 0.22/-0.20       | 1.46/-0.49    | 0.27/-0.15    | 0.52/-0.34    | 0.25/-0.44    | 0.18/-0.16    |
| Flack parameter <sup>d</sup>                              | -0.006(6)        | -0.004(9)     | -0.005(3)     | -0.024(5)     | -0.019(9)     | -0.006(3)     |
| CCDC number                                               | 2000645          | 2000643       | 2000647       | 2000651       | 2000649       | 2149672       |

<sup>a</sup> Goodness-of-fit =  $[\sum[w(F_o^2 - F_c^2)^2]/(n - p)]^{1/2}$ ; <sup>b</sup>  $R_1 = [\sum(|F_o| - |F_c|)]/\sum|F_o|$ ;  $wR_2 = [\sum[w(F_o^2 - F_c^2)^2]/\sum[w(F_o^2)^2]]^{1/2}$ ; <sup>c</sup>

Largest difference peak and hole; <sup>d</sup> Absolute structure parameter.<sup>1,2</sup>

**Table S2.** Excited state properties for  $\Lambda$ -NiRL<sup>1</sup> (Excited states, excitation energy (eV), wavelength (nm) and oscillator strength ( $f$ )), calculated at b3lyp/6-31G(d) with PCM in chloroform.

Excitation energies and oscillator strengths:

Excited State 1: 3.002-A 0.6374 eV 1945.23 nm  $f=0.0000$   $\langle S^{*2} \rangle = 2.002$

|             |          |
|-------------|----------|
| 154B ->165B | 0.36478  |
| 154B ->167B | 0.31260  |
| 155B ->165B | -0.18294 |
| 155B ->167B | -0.15585 |
| 157B ->165B | -0.22285 |
| 157B ->167B | -0.18537 |
| 158B ->168B | 0.27506  |
| 159B ->165B | -0.30147 |
| 159B ->167B | -0.24991 |
| 160B ->168B | 0.23529  |
| 162B ->165B | 0.42360  |
| 162B ->167B | 0.34440  |
| 163B ->165B | -0.12719 |
| 163B ->167B | -0.11074 |
| 164B ->168B | 0.13841  |
| 154B <-165B | 0.10513  |
| 158B <-168B | 0.12141  |
| 160B <-168B | 0.10318  |
| 162B <-165B | 0.10826  |

This state for optimization and/or second-order correction.

Total Energy, E(TD-HF/TD-KS) = -4766.63597251

Copying the excited state density for this state as the 1-particle RhoCI density.

Excited State 2: 3.005-A 0.7600 eV 1631.33 nm f=0.0000 <S\*\*2>=2.007

|             |          |
|-------------|----------|
| 153B ->165B | -0.13833 |
| 153B ->167B | -0.11687 |
| 154B ->168B | -0.14650 |
| 158B ->165B | 0.50863  |
| 158B ->167B | 0.41533  |
| 160B ->165B | 0.43744  |
| 160B ->167B | 0.35777  |
| 164B ->165B | 0.27444  |
| 164B ->167B | 0.21558  |

Excited State 3: 3.004-A 1.0571 eV 1172.89 nm f=0.0014 <S\*\*2>=2.006

|             |          |
|-------------|----------|
| 138B ->165B | 0.10563  |
| 148B ->165B | 0.18155  |
| 148B ->167B | 0.15788  |
| 150B ->165B | -0.11483 |
| 150B ->167B | -0.10073 |
| 153B ->168B | 0.11842  |
| 154B ->165B | 0.42210  |
| 154B ->167B | 0.35222  |
| 155B ->165B | 0.29587  |
| 155B ->167B | 0.24168  |
| 158B ->168B | -0.41628 |
| 160B ->168B | -0.35749 |
| 164B ->168B | -0.20632 |

Excited State 4: 3.003-A 1.6168 eV 766.84 nm f=0.0000 <S\*\*2>=2.004

|             |          |
|-------------|----------|
| 144B ->168B | 0.11771  |
| 148B ->168B | 0.25987  |
| 150B ->168B | -0.19562 |
| 155B ->168B | 0.57792  |
| 157B ->168B | 0.30083  |
| 159B ->168B | 0.33894  |
| 162B ->168B | -0.43003 |
| 163B ->168B | 0.28171  |

Excited State 5: 3.008-A 1.8630 eV 665.51 nm f=0.0014 <S\*\*2>=2.012

|             |          |
|-------------|----------|
| 148B ->165B | 0.16901  |
| 148B ->167B | 0.14272  |
| 150B ->165B | -0.11868 |
| 150B ->167B | -0.10090 |
| 153B ->168B | -0.12243 |



|             |          |
|-------------|----------|
| 154B ->165B | 0.19422  |
| 154B ->167B | 0.15030  |
| 155B ->165B | 0.37254  |
| 155B ->167B | 0.29302  |
| 157B ->165B | 0.13300  |
| 157B ->167B | 0.10438  |
| 158B ->168B | 0.44161  |
| 159B ->165B | 0.12657  |
| 160B ->168B | 0.38252  |
| 162B ->165B | -0.14240 |
| 162B ->167B | -0.10960 |
| 163B ->165B | 0.20492  |
| 163B ->167B | 0.14756  |
| 164B ->168B | 0.25932  |

Excited State 6: 3.069-A 2.4337 eV 509.45 nm f=0.0004 <S\*\*2>=2.105

|             |          |
|-------------|----------|
| 165A ->168A | -0.13183 |
| 166A ->167A | -0.18102 |
| 138B ->168B | 0.13384  |
| 148B ->168B | 0.19229  |
| 150B ->168B | -0.11207 |
| 151B ->168B | -0.11526 |
| 154B ->168B | 0.69471  |
| 155B ->168B | 0.25221  |
| 157B ->168B | -0.10909 |
| 159B ->168B | -0.22323 |
| 162B ->168B | 0.37238  |
| 164B ->165B | 0.15996  |

Excited State 7: 4.012-A 2.5560 eV 485.08 nm f=0.0003 <S\*\*2>=3.773

|             |          |
|-------------|----------|
| 165A ->167A | 0.49652  |
| 166A ->168A | 0.52413  |
| 163B ->165B | -0.43500 |
| 163B ->167B | 0.22761  |
| 164B ->166B | -0.44036 |

Excited State 8: 3.962-A 2.5642 eV 483.52 nm f=0.0001 <S\*\*2>=3.674

|             |          |
|-------------|----------|
| 165A ->168A | 0.47230  |
| 166A ->167A | 0.49904  |
| 154B ->168B | 0.18763  |
| 163B ->166B | -0.40859 |
| 164B ->165B | -0.42617 |

164B ->167B 0.26040

Excited State 9: 3.366-A 3.0280 eV 409.45 nm f=0.0503 <S\*\*2>=2.582

158A ->168A -0.11448

159A ->167A -0.16408

164A ->168A -0.15676

165A ->167A 0.11992

166A ->168A 0.25127

155B ->165B -0.16927

156B ->166B 0.18141

162B ->167B 0.24652

163B ->165B 0.71853

163B ->167B 0.28488

Excited State 10: 3.439-A 3.0312 eV 409.02 nm f=0.0101 <S\*\*2>=2.707

158A ->167A -0.11653

159A ->168A -0.16801

164A ->167A -0.18211

165A ->168A 0.12146

166A ->167A 0.29056

156B ->165B 0.11913

156B ->167B -0.15348

158B ->167B -0.18555

160B ->165B -0.17715

162B ->166B -0.26690

164B ->165B 0.67997

164B ->167B 0.23899

Excited State 11: 3.832-A 3.1593 eV 392.44 nm f=0.0088 <S\*\*2>=3.421

157A ->167A 0.10931

158A ->168A 0.18015

159A ->167A 0.26257

160A ->168A 0.12418

161A ->168A 0.10184

162A ->167A 0.12783

164A ->168A 0.32371

165A ->167A 0.25711

165A ->173A 0.10946

166A ->170A 0.11460

166A ->174A -0.10019

154B ->165B -0.10924

155B ->167B -0.12124

|             |          |
|-------------|----------|
| 156B ->166B | -0.25431 |
| 158B ->166B | -0.10756 |
| 162B ->165B | 0.33763  |
| 162B ->167B | -0.15439 |
| 163B ->165B | 0.34100  |
| 163B ->167B | 0.26537  |
| 163B ->170B | -0.11021 |
| 163B ->174B | 0.10514  |
| 164B ->166B | -0.23948 |
| 164B ->168B | 0.11851  |
| 164B ->173B | -0.11633 |

Excited State 12: 3.739-A 3.1636 eV 391.91 nm f=0.0010 <S\*\*2>=3.246

|             |          |
|-------------|----------|
| 158A ->167A | 0.18080  |
| 159A ->168A | 0.25923  |
| 160A ->167A | 0.12565  |
| 162A ->168A | 0.12229  |
| 164A ->167A | 0.32151  |
| 165A ->168A | 0.25274  |
| 165A ->170A | 0.10276  |
| 166A ->173A | 0.10663  |
| 156B ->165B | -0.23308 |
| 156B ->167B | 0.14252  |
| 158B ->165B | -0.19523 |
| 160B ->167B | -0.13040 |
| 162B ->166B | 0.29281  |
| 163B ->166B | -0.26338 |
| 163B ->168B | 0.15667  |
| 163B ->173B | -0.10945 |
| 164B ->165B | 0.40882  |
| 164B ->167B | 0.21567  |
| 164B ->170B | -0.11069 |
| 164B ->174B | 0.10600  |

Excited State 13: 3.442-A 3.2650 eV 379.73 nm f=0.0050 <S\*\*2>=2.711

|             |          |
|-------------|----------|
| 158A ->167A | 0.13178  |
| 159A ->168A | 0.19858  |
| 161A ->167A | 0.13179  |
| 164A ->167A | -0.20978 |
| 165A ->168A | -0.45872 |
| 166A ->167A | 0.72161  |
| 162B ->166B | 0.13107  |

163B ->166B 0.14578  
164B ->167B -0.13800

Excited State 14: 3.471-A 3.2793 eV 378.08 nm f=0.0073 <S\*\*2>=2.762

158A ->168A 0.13667  
159A ->167A 0.20888  
161A ->168A 0.13176  
164A ->168A -0.19034  
165A ->167A -0.46043  
166A ->168A 0.72666  
156B ->166B -0.12364  
162B ->165B 0.11301  
164B ->166B 0.12142

Excited State 15: 3.076-A 3.4157 eV 362.98 nm f=0.1015 <S\*\*2>=2.115

165A ->167A 0.57630  
166A ->168A 0.16844  
163B ->167B -0.12921  
164B ->166B 0.74797  
164B ->168B 0.11655

Excited State 16: 3.226-A 3.4473 eV 359.66 nm f=0.0638 <S\*\*2>=2.352

165A ->168A 0.63088  
166A ->167A 0.14554  
163B ->166B 0.61646  
164B ->167B -0.38721

Excited State 17: 3.517-A 3.5375 eV 350.48 nm f=0.0003 <S\*\*2>=2.843

158B ->165B -0.14598  
160B ->165B -0.12463  
163B ->166B 0.56498  
164B ->165B -0.23849  
164B ->167B 0.73939

Excited State 18: 3.657-A 3.5479 eV 349.46 nm f=0.0215 <S\*\*2>=3.093

164A ->168A 0.10328  
165A ->167A -0.24808  
163B ->165B -0.27515  
163B ->167B 0.80085  
164B ->166B 0.35824  
164B ->168B -0.12483

Excited State 19: 3.221-A 3.6893 eV 336.07 nm f=0.0578 <S\*\*2>=2.344

|             |          |
|-------------|----------|
| 159A ->167A | -0.10994 |
| 164A ->168A | -0.17059 |
| 166A ->168A | -0.10741 |
| 158B ->168B | -0.22632 |
| 160B ->168B | -0.19615 |
| 163B ->167B | 0.15527  |
| 164B ->168B | 0.83565  |

Excited State 20: 3.547-A 3.7145 eV 333.79 nm f=0.0014 <S\*\*2>=2.895

|             |          |
|-------------|----------|
| 161A ->169A | -0.14740 |
| 162A ->170A | 0.11699  |
| 163A ->172A | 0.16176  |
| 164A ->167A | -0.32646 |
| 165A ->174A | -0.10854 |
| 166A ->167A | -0.11268 |
| 155B ->168B | -0.10277 |
| 157B ->171B | -0.11121 |
| 159B ->169B | -0.13562 |
| 160B ->170B | 0.10192  |
| 161B ->172B | -0.15886 |
| 162B ->168B | 0.12426  |
| 163B ->168B | 0.68953  |
| 164B ->174B | 0.10742  |

Excited State 21: 4.107-A 3.7220 eV 333.11 nm f=0.0018 <S\*\*2>=3.966

|             |          |
|-------------|----------|
| 158A ->172A | -0.17805 |
| 160A ->170A | -0.16147 |
| 160A ->172A | 0.13236  |
| 160A ->174A | -0.16871 |
| 161A ->170A | 0.18189  |
| 161A ->172A | 0.21591  |
| 162A ->169A | -0.21046 |
| 162A ->171A | 0.17013  |
| 162A ->173A | 0.17063  |
| 163A ->169A | -0.30489 |
| 163A ->171A | -0.19942 |
| 163A ->173A | -0.11139 |
| 156B ->169B | -0.11101 |
| 157B ->172B | 0.23438  |
| 157B ->174B | -0.12336 |
| 158B ->169B | 0.12446  |

|             |          |
|-------------|----------|
| 158B ->171B | -0.12560 |
| 159B ->170B | 0.22798  |
| 159B ->172B | 0.11941  |
| 159B ->174B | 0.14471  |
| 160B ->169B | -0.12181 |
| 160B ->171B | 0.19330  |
| 160B ->173B | 0.10217  |
| 161B ->169B | 0.32160  |
| 161B ->171B | 0.19082  |
| 162B ->172B | 0.14601  |
| 164B ->168B | -0.11951 |

Excited State 22: 3.961-A 3.7311 eV 332.30 nm f=0.0006 <S\*\*2>=3.672

|             |          |
|-------------|----------|
| 158A ->169A | -0.12105 |
| 158A ->171A | -0.10388 |
| 160A ->171A | 0.18378  |
| 160A ->173A | 0.15459  |
| 161A ->169A | 0.28924  |
| 162A ->170A | -0.21392 |
| 162A ->174A | -0.18007 |
| 163A ->172A | -0.31167 |
| 164A ->167A | -0.16454 |
| 157B ->171B | 0.21723  |
| 158B ->170B | 0.13278  |
| 159B ->169B | 0.25085  |
| 159B ->171B | -0.10673 |
| 160B ->170B | -0.16415 |
| 160B ->174B | -0.14373 |
| 161B ->172B | 0.31017  |
| 162B ->169B | 0.16092  |
| 163B ->168B | 0.37257  |

Excited State 23: 3.439-A 3.8309 eV 323.65 nm f=0.0033 <S\*\*2>=2.707

|             |          |
|-------------|----------|
| 157A ->168A | 0.14639  |
| 158A ->167A | -0.16632 |
| 159A ->168A | -0.21501 |
| 160A ->167A | -0.12929 |
| 161A ->167A | -0.25267 |
| 164A ->167A | 0.70491  |
| 165A ->168A | -0.19711 |
| 166A ->167A | 0.23963  |
| 155B ->166B | -0.10358 |

163B ->166B 0.10698  
163B ->168B 0.35198

Excited State 24: 3.449-A 3.8333 eV 323.44 nm f=0.0258 <S\*\*2>=2.723

157A ->167A 0.17323  
158A ->168A -0.12082  
159A ->167A -0.15971  
161A ->168A -0.22486  
164A ->168A 0.77855  
165A ->167A -0.19696  
166A ->168A 0.24828  
163B ->167B -0.15613  
164B ->168B 0.18398

Excited State 25: 3.811-A 3.9056 eV 317.46 nm f=0.0002 <S\*\*2>=3.381

164A ->167A -0.14887  
165A ->170A -0.27867  
165A ->174A 0.24370  
166A ->171A 0.26379  
166A ->173A -0.25979  
157B ->166B -0.11097  
158B ->165B -0.14199  
159B ->166B -0.15996  
161B ->165B -0.19845  
162B ->166B 0.37916  
162B ->168B 0.10920  
163B ->168B 0.26163  
163B ->171B -0.17367  
163B ->173B 0.29812  
164B ->170B 0.24424  
164B ->174B -0.23519

Excited State 26: 3.828-A 3.9109 eV 317.03 nm f=0.0006 <S\*\*2>=3.414

161A ->168A 0.11486  
164A ->168A -0.17930  
165A ->171A 0.25867  
165A ->173A -0.26400  
166A ->170A -0.27715  
166A ->174A 0.24452  
158B ->166B -0.27532  
159B ->167B 0.11041  
160B ->166B -0.17688

162B ->165B 0.31690  
162B ->167B -0.23498  
163B ->170B 0.23796  
163B ->174B -0.23052  
164B ->168B 0.19071  
164B ->171B -0.17140  
164B ->173B 0.30087

Excited State 27: 3.301-A 3.9929 eV 310.51 nm f=0.0012 <S\*\*2>=2.474

158B ->165B 0.16223  
161B ->165B 0.93084  
161B ->167B 0.10321  
162B ->166B 0.11084

Excited State 28: 3.704-A 4.0003 eV 309.94 nm f=0.0113 <S\*\*2>=3.180

165A ->171A 0.11555  
165A ->173A -0.11011  
166A ->170A -0.12179  
166A ->174A 0.11447  
155B ->165B 0.10750  
158B ->166B 0.58639  
160B ->166B 0.65397  
161B ->166B -0.15085  
163B ->167B -0.10007  
164B ->166B -0.14102  
164B ->173B 0.10304

Excited State 29: 3.579-A 4.0499 eV 306.14 nm f=0.0014 <S\*\*2>=2.953

153B ->165B 0.17229  
155B ->166B 0.11752  
158B ->165B 0.17549  
158B ->167B -0.47291  
160B ->165B 0.65663  
160B ->167B -0.42566

Excited State 30: 3.225-A 4.0747 eV 304.28 nm f=0.0180 <S\*\*2>=2.350

159A ->167A -0.13203  
158B ->166B 0.10544  
159B ->165B 0.69860  
159B ->167B 0.11387  
162B ->165B 0.59372  
162B ->167B 0.14832



Excited State 31: 3.301-A 4.0982 eV 302.53 nm f=0.0002 <S\*\*2>=2.474

|             |          |
|-------------|----------|
| 158B ->165B | 0.72567  |
| 160B ->165B | -0.52370 |
| 160B ->167B | -0.27796 |
| 161B ->165B | -0.20405 |
| 162B ->166B | 0.11316  |

Excited State 32: 3.607-A 4.1860 eV 296.19 nm f=0.0020 <S\*\*2>=3.003

|             |          |
|-------------|----------|
| 159A ->168A | -0.13867 |
| 164A ->167A | -0.12729 |
| 165A ->170A | 0.10296  |
| 153B ->165B | -0.22394 |
| 154B ->166B | 0.18865  |
| 155B ->166B | -0.32475 |
| 156B ->165B | 0.41092  |
| 157B ->166B | -0.17761 |
| 158B ->167B | -0.14821 |
| 159B ->166B | -0.27814 |
| 162B ->166B | 0.48900  |
| 163B ->168B | -0.12661 |
| 163B ->173B | -0.13264 |
| 164B ->167B | 0.14593  |
| 164B ->170B | -0.12187 |
| 164B ->174B | 0.12599  |

Excited State 33: 3.599-A 4.1903 eV 295.89 nm f=0.1064 <S\*\*2>=2.987

|             |          |
|-------------|----------|
| 158A ->168A | 0.10713  |
| 159A ->167A | 0.23747  |
| 160A ->168A | 0.10565  |
| 161A ->168A | 0.11700  |
| 163A ->167A | -0.24148 |
| 164A ->168A | 0.14184  |
| 154B ->167B | 0.16859  |
| 155B ->165B | 0.17611  |
| 155B ->167B | -0.25981 |
| 156B ->166B | -0.17314 |
| 157B ->167B | -0.18378 |
| 158B ->166B | -0.14539 |
| 159B ->165B | 0.47073  |
| 159B ->167B | -0.23240 |
| 162B ->165B | -0.28648 |

162B ->167B 0.36486

Excited State 34: 3.899-A 4.2360 eV 292.69 nm f=0.0145 <S\*\*2>=3.551

162A ->167A 0.13528

163A ->167A 0.82421

164A ->168A -0.10416

157B ->165B -0.17386

159B ->165B 0.20315

161B ->166B -0.35107

162B ->165B -0.18720

Excited State 35: 3.626-A 4.2520 eV 291.59 nm f=0.0047 <S\*\*2>=3.037

159A ->168A -0.10809

162A ->168A 0.15609

163A ->168A 0.94924

164A ->167A -0.12725

Excited State 36: 3.230-A 4.2690 eV 290.43 nm f=0.0064 <S\*\*2>=2.359

163A ->167A 0.38609

154B ->165B -0.15875

155B ->165B 0.22044

157B ->165B 0.58592

159B ->165B -0.17830

161B ->166B 0.49828

162B ->165B 0.13603

162B ->167B 0.22377

Excited State 37: 3.290-A 4.3066 eV 287.89 nm f=0.0003 <S\*\*2>=2.456

157A ->168A -0.11119

159A ->168A 0.16380

161A ->167A 0.33606

164A ->167A 0.17069

153B ->165B 0.23965

155B ->166B 0.15337

156B ->165B 0.74262

156B ->167B 0.20326

158B ->167B 0.20747

159B ->166B 0.12855

161B ->167B 0.14052

Excited State 38: 3.364-A 4.3124 eV 287.50 nm f=0.0098 <S\*\*2>=2.579

162A ->167A 0.20245

163A ->167A 0.11565  
155B ->165B -0.11360  
157B ->165B -0.51146  
158B ->166B 0.11371  
159B ->165B 0.16600  
161B ->166B 0.71226  
162B ->165B -0.11268  
162B ->167B -0.19712

Excited State 39: 3.669-A 4.3376 eV 285.84 nm f=0.0054 <S\*\*2>=3.115

157A ->167A 0.18748  
159A ->167A -0.24682  
160A ->168A 0.15543  
161A ->168A -0.32171  
162A ->167A 0.77433  
163A ->167A -0.21651  
164A ->168A -0.17800  
161B ->166B -0.20566

Excited State 40: 3.667-A 4.3486 eV 285.11 nm f=0.0000 <S\*\*2>=3.112

157A ->168A 0.16252  
159A ->168A -0.15089  
160A ->167A 0.21583  
161A ->167A -0.32810  
162A ->168A 0.80591  
163A ->168A -0.15623  
164A ->167A -0.13347  
156B ->165B 0.20756  
156B ->167B 0.10772

Excited State 41: 3.790-A 4.3899 eV 282.43 nm f=0.0227 <S\*\*2>=3.341

157A ->167A -0.10737  
158A ->168A -0.13136  
159A ->167A -0.10093  
160A ->168A -0.11721  
161A ->168A 0.57423  
162A ->167A 0.26125  
154B ->165B 0.19989  
155B ->165B -0.35602  
156B ->166B 0.16886  
157B ->165B 0.30945  
158B ->166B -0.23033

160B ->166B 0.25542  
161B ->166B 0.11267

Excited State 42: 3.888-A 4.3955 eV 282.07 nm f=0.0007 <S\*\*2>=3.529

158A ->167A -0.20587  
159A ->168A -0.26226  
160A ->167A -0.17833  
161A ->167A 0.58160  
162A ->168A 0.35182  
163A ->168A -0.13697  
163A ->172A 0.11327  
153B ->165B -0.13282  
155B ->166B -0.11292  
156B ->165B -0.16162  
156B ->167B -0.15757  
159B ->166B 0.40600  
161B ->172B -0.11754  
162B ->166B 0.13792

Excited State 43: 3.317-A 4.4088 eV 281.22 nm f=0.0281 <S\*\*2>=2.500

157A ->167A 0.10754  
158A ->168A 0.10913  
161A ->168A -0.41022  
162A ->167A -0.32340  
154B ->167B 0.11758  
155B ->165B -0.22558  
158B ->166B -0.51947  
160B ->166B 0.54788

Excited State 44: 3.130-A 4.4101 eV 281.13 nm f=0.0139 <S\*\*2>=2.200

161A ->167A -0.48124  
162A ->168A -0.15283  
157B ->166B 0.10343  
159B ->166B 0.71906  
161B ->167B 0.12028  
162B ->166B 0.39009

Excited State 45: 3.306-A 4.4346 eV 279.58 nm f=0.0285 <S\*\*2>=2.482

159A ->167A -0.21236  
160A ->168A -0.22735  
161A ->168A 0.32539  
154B ->165B -0.22215

|             |          |
|-------------|----------|
| 154B ->167B | -0.15883 |
| 155B ->165B | 0.48691  |
| 156B ->166B | 0.12139  |
| 157B ->165B | -0.38443 |
| 158B ->166B | -0.27517 |
| 159B ->165B | -0.14792 |
| 159B ->167B | 0.12029  |
| 160B ->166B | 0.25638  |
| 162B ->165B | 0.10352  |
| 162B ->167B | 0.24579  |

Excited State 46: 3.378-A 4.4514 eV 278.53 nm f=0.0020 <S\*\*2>=2.603

|             |          |
|-------------|----------|
| 155B ->166B | -0.15914 |
| 157B ->166B | -0.12789 |
| 158B ->167B | 0.12106  |
| 161B ->167B | 0.92021  |
| 162B ->166B | -0.14197 |

Excited State 47: 3.532-A 4.4877 eV 276.27 nm f=0.0049 <S\*\*2>=2.869

|             |          |
|-------------|----------|
| 155A ->168A | 0.11395  |
| 157A ->167A | 0.52251  |
| 159A ->167A | -0.25714 |
| 160A ->168A | 0.12961  |
| 161A ->168A | 0.34517  |
| 162A ->167A | -0.16911 |
| 148B ->165B | 0.12308  |
| 150B ->165B | -0.10551 |
| 154B ->165B | -0.22993 |
| 154B ->167B | 0.25879  |
| 155B ->165B | -0.25237 |
| 155B ->167B | 0.11870  |
| 156B ->166B | -0.26860 |
| 158B ->166B | 0.14270  |
| 159B ->167B | 0.14924  |
| 162B ->167B | 0.11162  |

Excited State 48: 3.573-A 4.5019 eV 275.40 nm f=0.0006 <S\*\*2>=2.941

|             |          |
|-------------|----------|
| 155A ->167A | 0.14651  |
| 157A ->168A | 0.52518  |
| 158A ->167A | 0.11335  |
| 159A ->168A | -0.16457 |
| 161A ->167A | 0.14588  |

162A ->168A -0.23011  
152B ->165B -0.11339  
153B ->165B -0.15658  
154B ->166B -0.38808  
155B ->166B -0.22812  
156B ->167B 0.19196  
158B ->167B 0.17939  
159B ->166B 0.17123  
160B ->167B -0.33591

Excited State 49: 3.847-A 4.5196 eV 274.32 nm f=0.0002 <S\*\*2>=3.449

157A ->168A 0.30414  
158A ->167A -0.15980  
159A ->168A -0.37733  
160A ->167A 0.54151  
161A ->167A 0.19206  
162A ->168A -0.15499  
154B ->166B 0.16062  
155B ->166B 0.25510  
157B ->166B 0.29784  
158B ->167B -0.11444  
160B ->167B 0.16874  
162B ->166B 0.14516

Excited State 50: 3.437-A 4.5227 eV 274.14 nm f=0.1198 <S\*\*2>=2.702

157A ->167A -0.39484  
159A ->167A 0.33171  
162A ->167A 0.19456  
148B ->165B 0.11411  
150B ->165B -0.10689  
154B ->165B -0.24930  
154B ->167B 0.11758  
155B ->165B -0.21442  
155B ->167B 0.23470  
157B ->167B 0.12188  
159B ->165B -0.11843  
159B ->167B 0.42097  
162B ->167B 0.45365

Excited State 51: 3.392-A 4.5341 eV 273.45 nm f=0.0040 <S\*\*2>=2.627

157A ->168A -0.19147  
158A ->167A -0.11181

|             |          |
|-------------|----------|
| 159A ->168A | 0.14713  |
| 160A ->167A | 0.51183  |
| 153B ->167B | 0.12271  |
| 154B ->166B | -0.32869 |
| 155B ->166B | -0.49886 |
| 157B ->166B | -0.21599 |
| 158B ->167B | -0.22792 |
| 159B ->166B | 0.21294  |
| 160B ->167B | 0.20172  |
| 161B ->167B | -0.14024 |

Excited State 52: 3.717-A 4.5455 eV 272.76 nm f=0.0053 <S\*\*2>=3.204

|             |          |
|-------------|----------|
| 158A ->168A | -0.23628 |
| 159A ->167A | -0.15818 |
| 160A ->168A | 0.79497  |
| 163A ->169A | 0.13770  |
| 154B ->165B | 0.13271  |
| 154B ->167B | -0.11795 |
| 156B ->166B | 0.15574  |
| 159B ->167B | 0.19419  |
| 161B ->169B | -0.13211 |

Excited State 53: 3.599-A 4.5687 eV 271.38 nm f=0.0003 <S\*\*2>=2.988

|             |          |
|-------------|----------|
| 157A ->168A | 0.29060  |
| 158A ->167A | 0.21417  |
| 160A ->167A | -0.30554 |
| 153B ->165B | 0.15412  |
| 155B ->166B | 0.13085  |
| 156B ->167B | 0.21744  |
| 157B ->166B | -0.30873 |
| 158B ->167B | -0.45190 |
| 160B ->167B | 0.55046  |
| 161B ->167B | 0.11385  |

Excited State 54: 3.406-A 4.5999 eV 269.54 nm f=0.0015 <S\*\*2>=2.650

|             |          |
|-------------|----------|
| 157A ->167A | 0.16426  |
| 158A ->168A | 0.15428  |
| 160A ->168A | -0.24461 |
| 153B ->166B | 0.11951  |
| 154B ->165B | 0.41585  |
| 154B ->167B | -0.12744 |
| 155B ->167B | -0.36904 |

157B ->165B 0.10450  
159B ->167B 0.63685  
162B ->167B 0.12016

Excited State 55: 3.455-A 4.6061 eV 269.18 nm f=0.0015 <S\*\*2>=2.735

159A ->168A 0.16697  
160A ->167A -0.34173  
162A ->168A 0.15294  
166A ->169A -0.13693  
154B ->166B -0.25354  
155B ->166B -0.22745  
157B ->166B 0.66262  
158B ->167B -0.13890  
159B ->166B -0.13422  
160B ->167B 0.14994  
161B ->170B 0.10817  
162B ->166B 0.16007

Excited State 56: 3.217-A 4.6138 eV 268.73 nm f=0.0044 <S\*\*2>=2.338

154A ->167A -0.12798  
158A ->167A 0.15183  
159A ->168A -0.21683  
148B ->168B 0.13553  
150B ->168B -0.12384  
152B ->165B 0.11575  
153B ->165B 0.69280  
153B ->167B 0.28868  
155B ->166B -0.23165  
156B ->165B -0.12082  
156B ->167B -0.18860  
158B ->167B 0.22702  
162B ->166B 0.13933  
163B ->168B -0.13423

Excited State 57: 3.960-A 4.6861 eV 264.58 nm f=0.0009 <S\*\*2>=3.670

158A ->170A 0.10671  
159A ->167A 0.13905  
160A ->168A -0.13232  
160A ->172A 0.22945  
161A ->170A -0.15660  
161A ->172A -0.11614  
161A ->174A -0.10854



|             |          |
|-------------|----------|
| 162A ->169A | 0.29263  |
| 162A ->171A | 0.12809  |
| 163A ->169A | 0.10451  |
| 163A ->171A | -0.23034 |
| 163A ->173A | -0.18265 |
| 166A ->170A | 0.11020  |
| 156B ->169B | 0.10480  |
| 157B ->167B | -0.25044 |
| 157B ->170B | -0.10545 |
| 157B ->172B | 0.19387  |
| 157B ->174B | -0.11536 |
| 158B ->169B | -0.16480 |
| 159B ->167B | 0.22255  |
| 159B ->170B | -0.13644 |
| 159B ->172B | -0.18365 |
| 160B ->169B | 0.22594  |
| 160B ->171B | 0.13117  |
| 161B ->169B | -0.11369 |
| 161B ->171B | 0.26719  |
| 161B ->173B | 0.11204  |
| 164B ->169B | 0.11681  |

Excited State 58: 4.051-A 4.6934 eV 264.17 nm f=0.0004 <S\*\*2>=3.852

|             |          |
|-------------|----------|
| 158A ->171A | 0.11544  |
| 160A ->169A | -0.24212 |
| 160A ->171A | -0.13870 |
| 161A ->169A | 0.19970  |
| 161A ->171A | -0.11532 |
| 161A ->173A | -0.10370 |
| 162A ->170A | -0.13548 |
| 162A ->172A | -0.24071 |
| 163A ->170A | -0.15958 |
| 163A ->172A | 0.21531  |
| 163A ->174A | -0.18206 |
| 166A ->169A | -0.25359 |
| 166A ->171A | 0.12360  |
| 155B ->166B | 0.13010  |
| 157B ->166B | -0.23154 |
| 157B ->169B | -0.17434 |
| 157B ->171B | -0.19999 |
| 158B ->172B | 0.13818  |
| 159B ->169B | 0.27966  |

160B ->172B -0.22214  
161B ->170B 0.16499  
161B ->172B -0.20100  
161B ->174B 0.17288  
162B ->171B -0.12011

Excited State 59: 3.852-A 4.7013 eV 263.72 nm f=0.0176 <S\*\*2>=3.460

158A ->168A 0.25598  
159A ->167A -0.10789  
160A ->168A 0.28109  
160A ->170A 0.16429  
160A ->172A 0.10007  
160A ->174A 0.12262  
161A ->170A -0.10858  
161A ->172A 0.11236  
161A ->174A -0.10642  
162A ->167A -0.14281  
162A ->169A 0.20699  
162A ->171A -0.14473  
162A ->173A -0.13962  
163A ->169A -0.23959  
165A ->169A -0.11693  
166A ->172A -0.11190  
154B ->165B 0.11275  
157B ->167B 0.36904  
157B ->170B 0.14475  
157B ->172B 0.14111  
158B ->169B -0.11158  
158B ->171B 0.10463  
159B ->170B -0.15780  
159B ->174B -0.13259  
160B ->169B 0.19745  
160B ->171B -0.13538  
161B ->168B -0.16529  
161B ->169B 0.23128  
162B ->167B 0.14173

Excited State 60: 3.866-A 4.7419 eV 261.46 nm f=0.0008 <S\*\*2>=3.486

157A ->168A -0.24038  
158A ->167A 0.28806  
159A ->168A -0.19042  
160A ->167A 0.18957

|             |          |
|-------------|----------|
| 160A ->169A | -0.15440 |
| 161A ->171A | -0.11924 |
| 162A ->170A | -0.15818 |
| 162A ->174A | -0.14115 |
| 163A ->172A | 0.13362  |
| 165A ->176A | 0.12777  |
| 166A ->169A | 0.43523  |
| 166A ->175A | 0.12353  |
| 157B ->166B | 0.28027  |
| 157B ->169B | -0.15248 |
| 158B ->167B | -0.14915 |
| 159B ->171B | -0.17149 |
| 160B ->167B | 0.13183  |
| 160B ->170B | -0.13997 |
| 160B ->174B | -0.11297 |
| 161B ->172B | -0.14291 |
| 163B ->169B | -0.10116 |
| 163B ->175B | -0.10137 |
| 164B ->176B | -0.10267 |

Excited State 61: 3.164-A 4.7465 eV 261.21 nm f=0.0773 <S\*\*2>=2.252

|             |          |
|-------------|----------|
| 157A ->167A | 0.38031  |
| 158A ->168A | -0.29201 |
| 159A ->167A | 0.47102  |
| 156B ->166B | 0.39940  |
| 158B ->168B | -0.22672 |
| 160B ->168B | 0.14211  |
| 161B ->168B | -0.46608 |

Excited State 62: 3.735-A 4.7555 eV 260.72 nm f=0.0001 <S\*\*2>=3.238

|             |          |
|-------------|----------|
| 157A ->168A | -0.27404 |
| 158A ->167A | 0.50844  |
| 159A ->168A | -0.33493 |
| 165A ->176A | -0.33537 |
| 166A ->169A | -0.29145 |
| 166A ->175A | -0.33355 |
| 153B ->165B | -0.11087 |
| 163B ->175B | 0.26256  |
| 164B ->176B | 0.26665  |

Excited State 63: 4.022-A 4.7567 eV 260.65 nm f=0.0006 <S\*\*2>=3.795

|             |         |
|-------------|---------|
| 157A ->167A | 0.11568 |
|-------------|---------|

|             |          |
|-------------|----------|
| 158A ->168A | -0.18193 |
| 159A ->167A | 0.10508  |
| 164A ->176A | 0.12812  |
| 165A ->169A | 0.11567  |
| 165A ->175A | 0.50092  |
| 166A ->176A | 0.48897  |
| 163B ->176B | -0.39259 |
| 164B ->175B | -0.41026 |

Excited State 64: 3.868-A 4.7625 eV 260.34 nm f=0.0001 <S\*\*2>=3.489

|             |          |
|-------------|----------|
| 157A ->168A | -0.15729 |
| 158A ->167A | 0.36366  |
| 159A ->168A | -0.26077 |
| 165A ->176A | 0.36608  |
| 166A ->169A | -0.29733 |
| 166A ->175A | 0.37800  |
| 156B ->167B | 0.10932  |
| 163B ->175B | -0.30618 |
| 164B ->176B | -0.30818 |

Excited State 65: 3.583-A 4.7629 eV 260.31 nm f=0.0197 <S\*\*2>=2.960

|             |          |
|-------------|----------|
| 157A ->167A | -0.22133 |
| 158A ->168A | 0.53073  |
| 159A ->167A | -0.23017 |
| 164A ->168A | 0.10666  |
| 165A ->169A | 0.13533  |
| 165A ->175A | 0.14139  |
| 166A ->176A | 0.13698  |
| 154B ->165B | -0.13499 |
| 154B ->167B | 0.13007  |
| 156B ->166B | 0.27453  |
| 157B ->167B | -0.26959 |
| 158B ->168B | -0.19302 |
| 160B ->168B | 0.12264  |
| 161B ->168B | -0.42379 |
| 162B ->167B | -0.10205 |
| 163B ->176B | -0.11574 |
| 164B ->175B | -0.11819 |

Excited State 66: 3.607-A 4.7729 eV 259.76 nm f=0.0115 <S\*\*2>=3.003

|             |         |
|-------------|---------|
| 153A ->167A | 0.13740 |
| 155A ->168A | 0.14329 |

|             |          |
|-------------|----------|
| 160A ->168A | 0.10212  |
| 162A ->171A | -0.10572 |
| 163A ->169A | -0.10387 |
| 151B ->165B | -0.11489 |
| 152B ->166B | -0.12759 |
| 153B ->166B | 0.11161  |
| 154B ->167B | 0.14324  |
| 156B ->166B | 0.44029  |
| 157B ->167B | -0.17515 |
| 158B ->168B | 0.17028  |
| 159B ->172B | 0.10474  |
| 161B ->168B | 0.51658  |
| 161B ->169B | 0.12512  |
| 162B ->167B | -0.19320 |

Excited State 67: 3.519-A 4.8044 eV 258.06 nm f=0.0002 <S\*\*2>=2.845

|             |          |
|-------------|----------|
| 153A ->168A | -0.12630 |
| 154A ->167A | -0.10536 |
| 155A ->167A | -0.14739 |
| 157A ->168A | 0.23270  |
| 158A ->167A | 0.32277  |
| 161A ->169A | 0.13864  |
| 162A ->172A | -0.12630 |
| 165A ->170A | 0.10142  |
| 166A ->169A | 0.35876  |
| 166A ->171A | -0.10070 |
| 152B ->165B | 0.10909  |
| 153B ->165B | -0.12702 |
| 154B ->166B | 0.27387  |
| 155B ->166B | -0.19511 |
| 157B ->166B | 0.13070  |
| 159B ->168B | 0.15819  |
| 159B ->169B | 0.10157  |
| 162B ->166B | -0.23040 |
| 162B ->168B | 0.24644  |
| 163B ->169B | 0.15277  |

Excited State 68: 3.539-A 4.8063 eV 257.96 nm f=0.0230 <S\*\*2>=2.881

|             |         |
|-------------|---------|
| 157A ->167A | 0.18158 |
| 158A ->168A | 0.36641 |
| 162A ->171A | 0.12821 |
| 163A ->169A | 0.13349 |

|             |          |
|-------------|----------|
| 165A ->169A | 0.19237  |
| 166A ->170A | 0.19739  |
| 148B ->165B | -0.19065 |
| 150B ->165B | 0.16953  |
| 155B ->167B | 0.11832  |
| 156B ->166B | 0.25073  |
| 157B ->167B | 0.48236  |
| 159B ->167B | -0.10814 |
| 160B ->171B | 0.12039  |
| 161B ->168B | 0.31133  |
| 162B ->167B | 0.13865  |

Excited State 69: 3.708-A 4.8191 eV 257.28 nm f=0.0058 <S\*\*2>=3.187

|             |          |
|-------------|----------|
| 153A ->168A | 0.10615  |
| 157A ->168A | -0.20242 |
| 159A ->168A | -0.10009 |
| 160A ->167A | -0.10415 |
| 160A ->171A | -0.12115 |
| 161A ->169A | 0.11674  |
| 162A ->170A | 0.12841  |
| 162A ->172A | -0.11050 |
| 162A ->174A | 0.10331  |
| 163A ->170A | -0.10171 |
| 163A ->172A | -0.12525 |
| 166A ->169A | 0.56902  |
| 166A ->173A | -0.11185 |
| 155B ->166B | 0.12541  |
| 156B ->167B | -0.14746 |
| 157B ->166B | -0.22599 |
| 157B ->169B | 0.11212  |
| 159B ->168B | -0.12446 |
| 159B ->171B | 0.14757  |
| 160B ->170B | 0.10320  |
| 161B ->172B | 0.12260  |
| 162B ->166B | 0.11244  |
| 162B ->168B | -0.15637 |
| 163B ->169B | 0.15401  |

Excited State 70: 3.320-A 4.8215 eV 257.15 nm f=0.2093 <S\*\*2>=2.505

|             |          |
|-------------|----------|
| 153A ->167A | -0.11548 |
| 155A ->168A | -0.12243 |
| 157A ->167A | 0.18762  |

|             |          |
|-------------|----------|
| 158A ->168A | 0.25295  |
| 148B ->165B | 0.41721  |
| 148B ->167B | 0.23123  |
| 150B ->165B | -0.38648 |
| 150B ->167B | -0.20323 |
| 154B ->167B | -0.23472 |
| 155B ->167B | -0.24693 |
| 156B ->166B | 0.24717  |
| 157B ->167B | -0.16570 |
| 159B ->167B | -0.11301 |
| 161B ->168B | 0.12670  |

Excited State 71: 3.512-A 4.8367 eV 256.34 nm f=0.0030 <S\*\*2>=2.833

|             |          |
|-------------|----------|
| 153A ->167A | 0.10935  |
| 155A ->168A | 0.11217  |
| 157A ->167A | -0.17284 |
| 158A ->168A | -0.10474 |
| 165A ->169A | 0.51538  |
| 166A ->170A | -0.14167 |
| 166A ->172A | 0.13311  |
| 148B ->165B | 0.22721  |
| 148B ->167B | 0.11744  |
| 150B ->165B | -0.19168 |
| 150B ->167B | -0.11490 |
| 151B ->165B | -0.10225 |
| 155B ->167B | -0.36404 |
| 157B ->167B | 0.36530  |
| 159B ->167B | -0.10043 |
| 161B ->168B | -0.13716 |

Excited State 72: 3.256-A 4.8370 eV 256.32 nm f=0.0004 <S\*\*2>=2.400

|             |          |
|-------------|----------|
| 153A ->168A | 0.11967  |
| 157A ->168A | -0.18863 |
| 154B ->168B | -0.13391 |
| 156B ->167B | -0.12991 |
| 159B ->168B | 0.59627  |
| 162B ->168B | 0.62310  |

SavETr: write IOETrn= 770 NScale= 10 NData= 16 NLR=1 NState= 72 LETran= 1306.

## References

- [1] (a) H. D. Flack, M. Sadki, A. L. Thompson and D. J. Watkin, *Acta Crystallogr., A: Fundam. Crystallogr.*, 2011, **67**, 21; (b) H. D. Flack and G. Bernardinelli, *Chirality*, 2008, **20**, 681.
- [2] (a) H. D. Flack and G. Bernardinelli, *Acta Crystallogr., A: Fundam. Crystallogr.*, 1999, **55**, 908; (b) H. Flack, *Acta Crystallogr., A: Fundam. Crystallogr.*, 1983, **39**, 876.
